# Supplementary material for: Seismological reference earth model in South China (SREM-SC): Crust and uppermost mantle
Source: Frontiers journal article supplement (doi:10.3389/feart.2022.1080307), 2023-01-30
Supplement: Table_2.XLSX [file Table_2.XLSX]

## Sheet: Sheet1
100	18	5	5.3573	3.2269	2.4201
100.5	18	5	5.3458	3.225	2.4136
101	18	5	5.3457	3.2396	2.4136
101.5	18	5	5.3523	3.2414	2.4173
102	18	5	5.3504	3.2482	2.4162
102.5	18	5	5.384	3.2616	2.4351
103	18	5	5.3808	3.2578	2.4333
103.5	18	5	5.3875	3.2671	2.437
104	18	5	5.4013	3.2847	2.4447
104.5	18	5	5.4223	3.3113	2.4565
105	18	5	5.4053	3.3263	2.447
105.5	18	5	5.414	3.3249	2.4518
106	18	5	5.4408	3.3274	2.4668
106.5	18	5	5.4156	3.281	2.4527
107	18	5	5.3648	3.2111	2.4243
107.5	18	5	5.3132	3.1332	2.3954
108	18	5	5.2829	3.0814	2.3784
108.5	18	5	5.3345	3.1103	2.4073
109	18	5	5.3381	3.1698	2.4093
109.5	18	5	5.3987	3.2263	2.4433
110	18	5	5.4463	3.2739	2.4699
110.5	18	5	5.4777	3.2572	2.4875
111	18	5	5.5332	3.2641	2.5186
111.5	18	5	5.5112	3.262	2.5063
112	18	5	5.4981	3.2464	2.4989
112.5	18	5	5.4636	3.2166	2.4796
113	18	5	5.415	3.1759	2.4524
113.5	18	5	5.3738	3.1537	2.4293
114	18	5	5.4315	3.1444	2.4617
114.5	18	5	5.4157	3.1184	2.4528
115	18	5	5.3893	3.0824	2.438
115.5	18	5	5.3675	3.0486	2.4258
116	18	5	5.3806	3.0632	2.4331
116.5	18	5	5.3852	3.0659	2.4357
117	18	5	5.3661	3.042	2.425
117.5	18	5	5.3617	3.0383	2.4225
118	18	5	5.3408	3.0139	2.4108
118.5	18	5	5.3621	3.0337	2.4228
119	18	5	5.4268	3.1004	2.459
119.5	18	5	5.397	3.1253	2.4423
120	18	5	5.3863	3.1486	2.4363
120.5	18	5	5.2863	3.1323	2.3803
121	18	5	5.2436	3.1169	2.3564
100	18.5	5	5.3491	3.2321	2.4155
100.5	18.5	5	5.3445	3.2352	2.4129
101	18.5	5	5.3185	3.2381	2.3984
101.5	18.5	5	5.3549	3.2492	2.4188
102	18.5	5	5.3693	3.2601	2.4268
102.5	18.5	5	5.3884	3.2725	2.4375
103	18.5	5	5.3478	3.2613	2.4148
103.5	18.5	5	5.3923	3.2744	2.4397
104	18.5	5	5.3726	3.2803	2.4287
104.5	18.5	5	5.3308	3.2938	2.4052
105	18.5	5	5.3696	3.3175	2.427
105.5	18.5	5	5.4496	3.326	2.4718
106	18.5	5	5.4394	3.3098	2.4661
106.5	18.5	5	5.4127	3.2718	2.4511
107	18.5	5	5.3769	3.2199	2.431
107.5	18.5	5	5.3471	3.169	2.4144
108	18.5	5	5.3429	3.1399	2.412
108.5	18.5	5	5.3297	3.175	2.4046
109	18.5	5	5.3694	3.2325	2.4269
109.5	18.5	5	5.439	3.2933	2.4659
110	18.5	5	5.4699	3.3273	2.4832
110.5	18.5	5	5.5148	3.3235	2.5083
111	18.5	5	5.4356	3.2929	2.4639
111.5	18.5	5	5.458	3.2679	2.4765
112	18.5	5	5.427	3.2508	2.4591
112.5	18.5	5	5.4106	3.2228	2.4499
113	18.5	5	5.4054	3.1929	2.447
113.5	18.5	5	5.3716	3.1683	2.4281
114	18.5	5	5.409	3.1591	2.449
114.5	18.5	5	5.4382	3.1445	2.4654
115	18.5	5	5.4139	3.1119	2.4518
115.5	18.5	5	5.3943	3.0843	2.4408
116	18.5	5	5.3747	3.0627	2.4298
116.5	18.5	5	5.3561	3.056	2.4194
117	18.5	5	5.3784	3.0603	2.4319
117.5	18.5	5	5.3693	3.0494	2.4268
118	18.5	5	5.3579	3.0368	2.4204
118.5	18.5	5	5.3989	3.0698	2.4434
119	18.5	5	5.448	3.104	2.4709
119.5	18.5	5	5.4426	3.112	2.4678
120	18.5	5	5.4176	3.1175	2.4539
120.5	18.5	5	5.2905	3.1006	2.3827
121	18.5	5	5.2698	3.1128	2.3711
100	19	5	5.3208	3.2351	2.3997
100.5	19	5	5.3356	3.2379	2.4079
101	19	5	5.31	3.2384	2.3936
101.5	19	5	5.347	3.2468	2.4143
102	19	5	5.3487	3.2607	2.4153
102.5	19	5	5.3277	3.2639	2.4035
103	19	5	5.2628	3.2454	2.3672
103.5	19	5	5.3207	3.2586	2.3996
104	19	5	5.2742	3.2528	2.3736
104.5	19	5	5.3697	3.2947	2.427
105	19	5	5.448	3.3273	2.4709
105.5	19	5	5.4374	3.3087	2.4649
106	19	5	5.4236	3.288	2.4572
106.5	19	5	5.4104	3.265	2.4499
107	19	5	5.3962	3.2375	2.4419
107.5	19	5	5.3845	3.2101	2.4353
108	19	5	5.2953	3.1994	2.3854
108.5	19	5	5.3829	3.232	2.4344
109	19	5	5.3752	3.2805	2.4301
109.5	19	5	5.4421	3.3451	2.4676
110	19	5	5.5306	3.4098	2.5171
110.5	19	5	5.5629	3.3558	2.5352
111	19	5	5.4708	3.3115	2.4836
111.5	19	5	5.4768	3.2813	2.487
112	19	5	5.4357	3.2695	2.464
112.5	19	5	5.4079	3.2438	2.4484
113	19	5	5.3819	3.2158	2.4339
113.5	19	5	5.379	3.197	2.4322
114	19	5	5.385	3.1887	2.4356
114.5	19	5	5.3798	3.1711	2.4327
115	19	5	5.3884	3.1547	2.4375
115.5	19	5	5.3988	3.1331	2.4433
116	19	5	5.3812	3.1125	2.4335
116.5	19	5	5.3785	3.105	2.432
117	19	5	5.4093	3.1079	2.4492
117.5	19	5	5.4047	3.0955	2.4466
118	19	5	5.3925	3.0831	2.4398
118.5	19	5	5.402	3.0945	2.4451
119	19	5	5.4186	3.1051	2.4544
119.5	19	5	5.4253	3.1	2.4582
120	19	5	5.3891	3.0835	2.4379
120.5	19	5	5.4062	3.0873	2.4475
121	19	5	5.294	3.0871	2.3846
100	19.5	5	5.3589	3.2481	2.421
100.5	19.5	5	5.3238	3.2431	2.4013
101	19.5	5	5.3418	3.2453	2.4114
101.5	19.5	5	5.3086	3.2396	2.3928
102	19.5	5	5.3014	3.2471	2.3888
102.5	19.5	5	5.3566	3.2673	2.4197
103	19.5	5	5.309	3.2561	2.393
103.5	19.5	5	5.3618	3.2661	2.4226
104	19.5	5	5.3117	3.2593	2.3946
104.5	19.5	5	5.3603	3.2888	2.4218
105	19.5	5	5.4406	3.3169	2.4668
105.5	19.5	5	5.449	3.3042	2.4714
106	19.5	5	5.4366	3.2822	2.4645
106.5	19.5	5	5.4296	3.2653	2.4606
107	19.5	5	5.4266	3.2542	2.4589
107.5	19.5	5	5.3052	3.2491	2.3909
108	19.5	5	5.2683	3.2549	2.3703
108.5	19.5	5	5.3713	3.2697	2.4279
109	19.5	5	5.4235	3.2888	2.4572
109.5	19.5	5	5.3965	3.2927	2.442
110	19.5	5	5.4965	3.3445	2.4981
110.5	19.5	5	5.5152	3.3566	2.5085
111	19.5	5	5.4411	3.3263	2.467
111.5	19.5	5	5.4105	3.3065	2.4499
112	19.5	5	5.4613	3.2857	2.4783
112.5	19.5	5	5.4349	3.2673	2.4635
113	19.5	5	5.3995	3.2423	2.4437
113.5	19.5	5	5.3905	3.2272	2.4387
114	19.5	5	5.3971	3.2198	2.4424
114.5	19.5	5	5.413	3.2161	2.4513
115	19.5	5	5.4318	3.2132	2.4618
115.5	19.5	5	5.4351	3.2019	2.4637
116	19.5	5	5.3947	3.1829	2.441
116.5	19.5	5	5.413	3.1683	2.4512
117	19.5	5	5.4276	3.1573	2.4595
117.5	19.5	5	5.4203	3.1391	2.4554
118	19.5	5	5.4116	3.1248	2.4505
118.5	19.5	5	5.4037	3.115	2.4461
119	19.5	5	5.3711	3.0943	2.4278
119.5	19.5	5	5.381	3.0755	2.4333
120	19.5	5	5.4046	3.0617	2.4465
120.5	19.5	5	5.3641	3.0579	2.4239
121	19.5	5	5.403	3.0848	2.4457
100	20	5	5.3612	3.2568	2.4223
100.5	20	5	5.3608	3.253	2.422
101	20	5	5.3213	3.2414	2.3999
101.5	20	5	5.3053	3.2372	2.3909
102	20	5	5.3842	3.2527	2.4352
102.5	20	5	5.3801	3.2646	2.4328
103	20	5	5.3539	3.2669	2.4182
103.5	20	5	5.3211	3.2602	2.3998
104	20	5	5.3331	3.2626	2.4065
104.5	20	5	5.3882	3.2935	2.4374
105	20	5	5.4041	3.3111	2.4463
105.5	20	5	5.4698	3.3097	2.4831
106	20	5	5.4543	3.2842	2.4744
106.5	20	5	5.4499	3.269	2.472
107	20	5	5.3102	3.2735	2.3937
107.5	20	5	5.2993	3.2818	2.3876
108	20	5	5.3069	3.3046	2.3919
108.5	20	5	5.3332	3.2803	2.4066
109	20	5	5.3	3.2338	2.388
109.5	20	5	5.1712	3.1855	2.3159
110	20	5	5.2055	3.218	2.3351
110.5	20	5	5.4369	3.3157	2.4647
111	20	5	5.4376	3.3372	2.4651
111.5	20	5	5.383	3.3225	2.4345
112	20	5	5.3895	3.3101	2.4381
112.5	20	5	5.4602	3.2898	2.4777
113	20	5	5.4288	3.2684	2.4602
113.5	20	5	5.4183	3.2566	2.4543
114	20	5	5.4094	3.2488	2.4493
114.5	20	5	5.4042	3.2492	2.4464
115	20	5	5.4242	3.2574	2.4575
115.5	20	5	5.4433	3.259	2.4682
116	20	5	5.4358	3.2557	2.464
116.5	20	5	5.4057	3.2228	2.4472
117	20	5	5.4114	3.1985	2.4504
117.5	20	5	5.4098	3.1702	2.4495
118	20	5	5.4214	3.1516	2.456
118.5	20	5	5.3964	3.1248	2.442
119	20	5	5.3722	3.0928	2.4284
119.5	20	5	5.3535	3.06	2.418
120	20	5	5.3714	3.0431	2.428
120.5	20	5	5.3615	3.0461	2.4224
121	20	5	5.3155	3.0624	2.3967
100	20.5	5	5.3458	3.2485	2.4137
100.5	20.5	5	5.3693	3.25	2.4268
101	20.5	5	5.3601	3.2536	2.4217
101.5	20.5	5	5.3569	3.2521	2.4199
102	20.5	5	5.3143	3.2414	2.396
102.5	20.5	5	5.3754	3.2603	2.4303
103	20.5	5	5.355	3.2674	2.4188
103.5	20.5	5	5.4029	3.2846	2.4456
104	20.5	5	5.3834	3.2824	2.4347
104.5	20.5	5	5.3986	3.299	2.4432
105	20.5	5	5.451	3.3167	2.4726
105.5	20.5	5	5.3622	3.335	2.4228
106	20.5	5	5.3523	3.3199	2.4173
106.5	20.5	5	5.3296	3.2916	2.4045
107	20.5	5	5.3497	3.3097	2.4158
107.5	20.5	5	5.3713	3.3118	2.4279
108	20.5	5	5.339	3.2967	2.4099
108.5	20.5	5	5.2559	3.2262	2.3633
109	20.5	5	5.1886	3.145	2.3256
109.5	20.5	5	5.1875	3.1648	2.325
110	20.5	5	5.1063	3.1096	2.2796
110.5	20.5	5	5.2944	3.2578	2.3849
111	20.5	5	5.4162	3.3175	2.4531
111.5	20.5	5	5.4039	3.3373	2.4462
112	20.5	5	5.4134	3.338	2.4515
112.5	20.5	5	5.4079	3.316	2.4484
113	20.5	5	5.3863	3.2934	2.4364
113.5	20.5	5	5.4166	3.2888	2.4533
114	20.5	5	5.4563	3.2855	2.4755
114.5	20.5	5	5.453	3.2888	2.4737
115	20.5	5	5.4507	3.2891	2.4724
115.5	20.5	5	5.454	3.2888	2.4742
116	20.5	5	5.4437	3.2777	2.4685
116.5	20.5	5	5.4088	3.2459	2.4489
117	20.5	5	5.3791	3.2082	2.4323
117.5	20.5	5	5.3877	3.1762	2.4371
118	20.5	5	5.3914	3.1508	2.4392
118.5	20.5	5	5.3857	3.1257	2.436
119	20.5	5	5.3776	3.1051	2.4315
119.5	20.5	5	5.3688	3.0848	2.4265
120	20.5	5	5.3858	3.0619	2.4361
120.5	20.5	5	5.3258	3.0499	2.4025
121	20.5	5	5.359	3.0632	2.421
100	21	5	5.2973	3.262	2.3865
100.5	21	5	5.3235	3.2529	2.4011
101	21	5	5.3652	3.2517	2.4245
101.5	21	5	5.3174	3.2561	2.3977
102	21	5	5.3274	3.2505	2.4034
102.5	21	5	5.3943	3.2446	2.4408
103	21	5	5.4014	3.2615	2.4448
103.5	21	5	5.3344	3.3126	2.4073
104	21	5	5.3187	3.3233	2.3985
104.5	21	5	5.3478	3.338	2.4148
105	21	5	5.3742	3.3505	2.4296
105.5	21	5	5.3891	3.3462	2.4379
106	21	5	5.4083	3.3573	2.4486
106.5	21	5	5.4354	3.3705	2.4638
107	21	5	5.4445	3.3624	2.4689
107.5	21	5	5.3794	3.3311	2.4324
108	21	5	5.3032	3.2835	2.3898
108.5	21	5	5.229	3.2125	2.3483
109	21	5	5.213	3.1679	2.3393
109.5	21	5	5.2675	3.1747	2.3698
110	21	5	5.2985	3.2188	2.3872
110.5	21	5	5.3175	3.2523	2.3978
111	21	5	5.4011	3.3365	2.4446
111.5	21	5	5.413	3.3635	2.4513
112	21	5	5.4338	3.3686	2.4629
112.5	21	5	5.4611	3.3552	2.4782
113	21	5	5.4241	3.3318	2.4575
113.5	21	5	5.3683	3.3173	2.4263
114	21	5	5.3671	3.3138	2.4256
114.5	21	5	5.495	3.3182	2.4972
115	21	5	5.484	3.314	2.491
115.5	21	5	5.4672	3.3039	2.4816
116	21	5	5.4469	3.283	2.4703
116.5	21	5	5.4188	3.2538	2.4545
117	21	5	5.3785	3.2114	2.4319
117.5	21	5	5.3572	3.176	2.42
118	21	5	5.3666	3.1521	2.4253
118.5	21	5	5.3936	3.1337	2.4404
119	21	5	5.387	3.1179	2.4367
119.5	21	5	5.392	3.1065	2.4395
120	21	5	5.3796	3.0886	2.4326
120.5	21	5	5.2782	3.0534	2.3758
121	21	5	5.3693	3.065	2.4268
100	21.5	5	5.3232	3.2784	2.401
100.5	21.5	5	5.3413	3.2655	2.4111
101	21.5	5	5.3587	3.2616	2.4209
101.5	21.5	5	5.4001	3.2644	2.4441
102	21.5	5	5.2214	3.2388	2.344
102.5	21.5	5	5.2073	3.2512	2.3361
103	21.5	5	5.2661	3.2725	2.369
103.5	21.5	5	5.3326	3.3303	2.4062
104	21.5	5	5.352	3.3469	2.4171
104.5	21.5	5	5.3795	3.3544	2.4325
105	21.5	5	5.4245	3.3748	2.4577
105.5	21.5	5	5.481	3.3926	2.4893
106	21.5	5	5.5343	3.4189	2.5192
106.5	21.5	5	5.5387	3.4231	2.5217
107	21.5	5	5.4536	3.3904	2.474
107.5	21.5	5	5.4006	3.3632	2.4443
108	21.5	5	5.3625	3.3175	2.423
108.5	21.5	5	5.3311	3.2744	2.4054
109	21.5	5	5.3608	3.2671	2.4221
109.5	21.5	5	5.4184	3.3055	2.4543
110	21.5	5	5.4755	3.3565	2.4863
110.5	21.5	5	5.5185	3.3596	2.5103
111	21.5	5	5.5762	3.4074	2.5427
111.5	21.5	5	5.5738	3.4239	2.5413
112	21.5	5	5.5426	3.4249	2.5239
112.5	21.5	5	5.5347	3.4022	2.5195
113	21.5	5	5.5379	3.3858	2.5212
113.5	21.5	5	5.4876	3.3711	2.4931
114	21.5	5	5.4738	3.3611	2.4853
114.5	21.5	5	5.4608	3.3573	2.478
115	21.5	5	5.4476	3.3469	2.4707
115.5	21.5	5	5.4564	3.3271	2.4756
116	21.5	5	5.4842	3.3028	2.4911
116.5	21.5	5	5.4482	3.2711	2.471
117	21.5	5	5.4098	3.2326	2.4495
117.5	21.5	5	5.3636	3.1938	2.4236
118	21.5	5	5.3908	3.1714	2.4389
118.5	21.5	5	5.4045	3.1507	2.4465
119	21.5	5	5.3833	3.1385	2.4346
119.5	21.5	5	5.3822	3.1287	2.4341
120	21.5	5	5.3759	3.1128	2.4305
120.5	21.5	5	5.2669	3.077	2.3694
121	21.5	5	5.2435	3.048	2.3563
100	22	5	5.3096	3.3018	2.3934
100.5	22	5	5.3437	3.2852	2.4125
101	22	5	5.3337	3.2598	2.4069
101.5	22	5	5.3134	3.2588	2.3955
102	22	5	5.245	3.2615	2.3572
102.5	22	5	5.2193	3.2535	2.3428
103	22	5	5.2901	3.2872	2.3825
103.5	22	5	5.3762	3.3432	2.4307
104	22	5	5.4136	3.3827	2.4516
104.5	22	5	5.4428	3.3852	2.468
105	22	5	5.4927	3.3953	2.4959
105.5	22	5	5.543	3.4188	2.5241
106	22	5	5.5539	3.4339	2.5302
106.5	22	5	5.5442	3.4294	2.5247
107	22	5	5.4747	3.4104	2.4858
107.5	22	5	5.4454	3.4169	2.4694
108	22	5	5.4931	3.4327	2.4961
108.5	22	5	5.4923	3.4303	2.4957
109	22	5	5.5256	3.4222	2.5144
109.5	22	5	5.5869	3.4614	2.5487
110	22	5	5.6483	3.5334	2.583
110.5	22	5	5.6933	3.4751	2.6082
111	22	5	5.768	3.4663	2.6501
111.5	22	5	5.8405	3.4884	2.6907
112	22	5	5.8136	3.4838	2.6756
112.5	22	5	5.6899	3.4478	2.6063
113	22	5	5.6716	3.4408	2.5961
113.5	22	5	5.6141	3.4244	2.5639
114	22	5	5.5821	3.4131	2.546
114.5	22	5	5.5823	3.3996	2.5461
115	22	5	5.555	3.3853	2.5308
115.5	22	5	5.4788	3.3585	2.4881
116	22	5	5.4159	3.3286	2.4529
116.5	22	5	5.3695	3.2925	2.4269
117	22	5	5.438	3.2609	2.4653
117.5	22	5	5.3974	3.2214	2.4426
118	22	5	5.3701	3.1884	2.4272
118.5	22	5	5.3917	3.1736	2.4394
119	22	5	5.3482	3.1561	2.415
119.5	22	5	5.3568	3.149	2.4198
120	22	5	5.3057	3.1303	2.3912
120.5	22	5	5.2405	3.0955	2.3547
121	22	5	5.2618	3.0715	2.3666
100	22.5	5	5.4219	3.3039	2.4563
100.5	22.5	5	5.3901	3.2883	2.4384
101	22.5	5	5.2594	3.1876	2.3653
101.5	22.5	5	5.2877	3.2346	2.3811
102	22.5	5	5.3336	3.269	2.4068
102.5	22.5	5	5.3439	3.2668	2.4126
103	22.5	5	5.5111	3.3365	2.5062
103.5	22.5	5	5.5074	3.3741	2.5042
104	22.5	5	5.6633	3.4493	2.5914
104.5	22.5	5	5.56	3.4167	2.5336
105	22.5	5	5.5915	3.4209	2.5512
105.5	22.5	5	5.5855	3.4307	2.5479
106	22.5	5	5.5543	3.4303	2.5304
106.5	22.5	5	5.5552	3.4313	2.5309
107	22.5	5	5.4979	3.4168	2.4989
107.5	22.5	5	5.5775	3.4341	2.5434
108	22.5	5	5.5521	3.4605	2.5292
108.5	22.5	5	5.5277	3.4693	2.5155
109	22.5	5	5.5524	3.4892	2.5293
109.5	22.5	5	5.5963	3.4998	2.5539
110	22.5	5	5.712	3.5123	2.6187
110.5	22.5	5	5.7372	3.491	2.6328
111	22.5	5	5.7292	3.4902	2.6284
111.5	22.5	5	5.7656	3.5334	2.6488
112	22.5	5	5.7443	3.5244	2.6368
112.5	22.5	5	5.7149	3.4852	2.6203
113	22.5	5	5.7072	3.4465	2.616
113.5	22.5	5	5.7064	3.4655	2.6156
114	22.5	5	5.6946	3.4544	2.609
114.5	22.5	5	5.6769	3.4475	2.5991
115	22.5	5	5.7322	3.4236	2.63
115.5	22.5	5	5.6578	3.4034	2.5884
116	22.5	5	5.536	3.3713	2.5202
116.5	22.5	5	5.466	3.3375	2.4809
117	22.5	5	5.429	3.3037	2.4602
117.5	22.5	5	5.3464	3.2639	2.414
118	22.5	5	5.2785	3.2214	2.376
118.5	22.5	5	5.2338	3.188	2.3509
119	22.5	5	5.2108	3.1693	2.338
119.5	22.5	5	5.2731	3.1583	2.3729
120	22.5	5	5.2801	3.1415	2.3768
120.5	22.5	5	5.227	3.1236	2.3471
121	22.5	5	5.2574	3.1041	2.3641
100	23	5	5.4627	3.3122	2.4791
100.5	23	5	5.4228	3.2734	2.4568
101	23	5	5.3143	3.188	2.396
101.5	23	5	5.2163	3.2121	2.3411
102	23	5	5.3487	3.2609	2.4153
102.5	23	5	5.4956	3.3032	2.4975
103	23	5	5.675	3.3791	2.598
103.5	23	5	5.5837	3.3889	2.5469
104	23	5	5.6073	3.4071	2.5601
104.5	23	5	5.5729	3.4168	2.5408
105	23	5	5.5511	3.4236	2.5286
105.5	23	5	5.5447	3.4326	2.525
106	23	5	5.5412	3.4331	2.5231
106.5	23	5	5.5571	3.4432	2.532
107	23	5	5.5062	3.4393	2.5035
107.5	23	5	5.5692	3.467	2.5387
108	23	5	5.6122	3.4768	2.5628
108.5	23	5	5.5079	3.4692	2.5044
109	23	5	5.564	3.5052	2.5359
109.5	23	5	5.6101	3.5161	2.5617
110	23	5	5.6562	3.5138	2.5875
110.5	23	5	5.7126	3.5174	2.6191
111	23	5	5.7133	3.5096	2.6194
111.5	23	5	5.7193	3.5171	2.6228
112	23	5	5.7819	3.5277	2.6579
112.5	23	5	5.7671	3.4707	2.6496
113	23	5	5.7554	3.4423	2.643
113.5	23	5	5.7882	3.4603	2.6614
114	23	5	5.7562	3.4652	2.6435
114.5	23	5	5.7373	3.4619	2.6329
115	23	5	5.8204	3.4473	2.6794
115.5	23	5	5.8132	3.4464	2.6754
116	23	5	5.6809	3.408	2.6013
116.5	23	5	5.6014	3.3742	2.5568
117	23	5	5.4746	3.3508	2.4858
117.5	23	5	5.3949	3.3102	2.4411
118	23	5	5.2878	3.2618	2.3812
118.5	23	5	5.2029	3.2215	2.3336
119	23	5	5.1535	3.1917	2.306
119.5	23	5	5.1437	3.1764	2.3005
120	23	5	5.1909	3.1624	2.3269
120.5	23	5	5.1984	3.1467	2.3311
121	23	5	5.1905	3.1194	2.3267
100	23.5	5	5.4782	3.3082	2.4878
100.5	23.5	5	5.3911	3.2684	2.439
101	23.5	5	5.2656	3.2327	2.3688
101.5	23.5	5	5.3163	3.2435	2.3971
102	23.5	5	5.5411	3.3044	2.523
102.5	23.5	5	5.5861	3.3346	2.5482
103	23.5	5	5.6426	3.3646	2.5799
103.5	23.5	5	5.5944	3.3735	2.5528
104	23.5	5	5.6283	3.388	2.5718
104.5	23.5	5	5.617	3.4354	2.5655
105	23.5	5	5.5418	3.4105	2.5234
105.5	23.5	5	5.5229	3.4265	2.5128
106	23.5	5	5.595	3.4508	2.5532
106.5	23.5	5	5.6154	3.4624	2.5646
107	23.5	5	5.5689	3.4628	2.5386
107.5	23.5	5	5.6875	3.5051	2.605
108	23.5	5	5.7035	3.5055	2.6139
108.5	23.5	5	5.6117	3.4984	2.5626
109	23.5	5	5.6159	3.5041	2.5649
109.5	23.5	5	5.657	3.5038	2.588
110	23.5	5	5.648	3.5069	2.5829
110.5	23.5	5	5.6455	3.5028	2.5815
111	23.5	5	5.691	3.5046	2.607
111.5	23.5	5	5.7043	3.4838	2.6144
112	23.5	5	5.721	3.4923	2.6238
112.5	23.5	5	5.7576	3.4845	2.6443
113	23.5	5	5.8088	3.4722	2.673
113.5	23.5	5	5.8424	3.4631	2.6918
114	23.5	5	5.8527	3.4664	2.6975
114.5	23.5	5	5.8247	3.4664	2.6818
115	23.5	5	5.9164	3.4558	2.7332
115.5	23.5	5	5.8627	3.4426	2.7031
116	23.5	5	5.6829	3.4066	2.6024
116.5	23.5	5	5.6342	3.3944	2.5751
117	23.5	5	5.6988	3.3979	2.6113
117.5	23.5	5	5.6144	3.3715	2.5641
118	23.5	5	5.3737	3.3262	2.4293
118.5	23.5	5	5.2729	3.281	2.3728
119	23.5	5	5.2033	3.2435	2.3338
119.5	23.5	5	5.1751	3.2123	2.3181
120	23.5	5	5.1799	3.1803	2.3208
120.5	23.5	5	5.1338	3.1491	2.2949
121	23.5	5	5.1218	3.1005	2.2882
100	24	5	5.5675	3.3232	2.5378
100.5	24	5	5.4695	3.2972	2.4829
101	24	5	5.4107	3.2718	2.45
101.5	24	5	5.4739	3.3115	2.4854
102	24	5	5.5852	3.3545	2.5477
102.5	24	5	5.5445	3.3458	2.5249
103	24	5	5.5724	3.3164	2.5405
103.5	24	5	5.631	3.3472	2.5734
104	24	5	5.5907	3.3531	2.5508
104.5	24	5	5.5603	3.4164	2.5338
105	24	5	5.5818	3.4179	2.5458
105.5	24	5	5.526	3.4134	2.5146
106	24	5	5.6018	3.4467	2.557
106.5	24	5	5.6341	3.4628	2.5751
107	24	5	5.633	3.4783	2.5745
107.5	24	5	5.6415	3.5192	2.5792
108	24	5	5.7371	3.5438	2.6328
108.5	24	5	5.7197	3.5351	2.623
109	24	5	5.633	3.5183	2.5745
109.5	24	5	5.6466	3.4964	2.5821
110	24	5	5.645	3.4788	2.5812
110.5	24	5	5.5903	3.4913	2.5506
111	24	5	5.6179	3.4736	2.566
111.5	24	5	5.6309	3.4608	2.5733
112	24	5	5.6724	3.4727	2.5965
112.5	24	5	5.7299	3.4763	2.6288
113	24	5	5.8229	3.494	2.6808
113.5	24	5	5.8692	3.4849	2.7068
114	24	5	5.8795	3.5	2.7125
114.5	24	5	5.8093	3.4792	2.6732
115	24	5	5.9081	3.4712	2.7285
115.5	24	5	5.8277	3.453	2.6835
116	24	5	5.7266	3.4398	2.6269
116.5	24	5	5.672	3.4363	2.5963
117	24	5	5.726	3.4566	2.6266
117.5	24	5	5.8335	3.4303	2.6868
118	24	5	5.5794	3.3976	2.5445
118.5	24	5	5.361	3.3479	2.4222
119	24	5	5.2699	3.2958	2.3711
119.5	24	5	5.1919	3.2409	2.3274
120	24	5	5.104	3.1809	2.2782
120.5	24	5	5.0261	3.1223	2.2346
121	24	5	5.0455	3.1008	2.2455
100	24.5	5	5.4253	3.2946	2.4582
100.5	24.5	5	5.4464	3.3237	2.47
101	24.5	5	5.4828	3.3318	2.4904
101.5	24.5	5	5.4529	3.3139	2.4736
102	24.5	5	5.5209	3.3261	2.5117
102.5	24.5	5	5.4911	3.3473	2.495
103	24.5	5	5.3627	3.283	2.4231
103.5	24.5	5	5.4494	3.3065	2.4717
104	24.5	5	5.4928	3.3207	2.496
104.5	24.5	5	5.5626	3.4115	2.535
105	24.5	5	5.5967	3.4282	2.5541
105.5	24.5	5	5.5528	3.4299	2.5296
106	24.5	5	5.5647	3.4417	2.5362
106.5	24.5	5	5.5873	3.4547	2.5489
107	24.5	5	5.6567	3.4892	2.5878
107.5	24.5	5	5.6232	3.4957	2.569
108	24.5	5	5.6303	3.4657	2.573
108.5	24.5	5	5.6098	3.4589	2.5615
109	24.5	5	5.6145	3.4707	2.5641
109.5	24.5	5	5.5565	3.4453	2.5316
110	24.5	5	5.5675	3.4435	2.5378
110.5	24.5	5	5.5986	3.4728	2.5552
111	24.5	5	5.5538	3.4762	2.5301
111.5	24.5	5	5.6205	3.4684	2.5675
112	24.5	5	5.6713	3.4899	2.5959
112.5	24.5	5	5.7451	3.5109	2.6372
113	24.5	5	5.7959	3.5081	2.6657
113.5	24.5	5	5.8949	3.4912	2.7212
114	24.5	5	5.8223	3.4861	2.6805
114.5	24.5	5	5.7833	3.4602	2.6586
115	24.5	5	5.7867	3.4542	2.6605
115.5	24.5	5	5.7901	3.4593	2.6624
116	24.5	5	5.6949	3.4495	2.6092
116.5	24.5	5	5.7395	3.4604	2.6341
117	24.5	5	5.7647	3.4447	2.6482
117.5	24.5	5	5.8522	3.4694	2.6973
118	24.5	5	5.7969	3.4581	2.6663
118.5	24.5	5	5.53	3.4072	2.5168
119	24.5	5	5.3314	3.3455	2.4056
119.5	24.5	5	5.2152	3.2746	2.3405
120	24.5	5	5.0983	3.1989	2.2751
120.5	24.5	5	5.037	3.1407	2.2407
121	24.5	5	5.0373	3.0935	2.2409
100	25	5	5.4291	3.3026	2.4603
100.5	25	5	5.4291	3.3017	2.4603
101	25	5	5.4355	3.3197	2.4639
101.5	25	5	5.3833	3.2953	2.4346
102	25	5	5.4984	3.3058	2.4991
102.5	25	5	5.471	3.3557	2.4837
103	25	5	5.4042	3.3106	2.4463
103.5	25	5	5.403	3.3284	2.4457
104	25	5	5.368	3.3219	2.4261
104.5	25	5	5.5037	3.3508	2.5021
105	25	5	5.5501	3.3915	2.528
105.5	25	5	5.5977	3.4303	2.5547
106	25	5	5.5785	3.4242	2.544
106.5	25	5	5.6148	3.4432	2.5643
107	25	5	5.6495	3.4529	2.5837
107.5	25	5	5.6364	3.4572	2.5764
108	25	5	5.5667	3.4474	2.5374
108.5	25	5	5.6113	3.4456	2.5624
109	25	5	5.5821	3.471	2.546
109.5	25	5	5.5468	3.467	2.5262
110	25	5	5.5274	3.4597	2.5154
110.5	25	5	5.5549	3.4538	2.5307
111	25	5	5.5987	3.4959	2.5553
111.5	25	5	5.6013	3.4886	2.5567
112	25	5	5.6335	3.4854	2.5748
112.5	25	5	5.6953	3.4998	2.6094
113	25	5	5.7286	3.4799	2.628
113.5	25	5	5.7108	3.4535	2.618
114	25	5	5.7015	3.4615	2.6128
114.5	25	5	5.6884	3.4534	2.6055
115	25	5	5.7854	3.4442	2.6598
115.5	25	5	5.7825	3.4472	2.6582
116	25	5	5.7537	3.4696	2.6421
116.5	25	5	5.7502	3.466	2.6401
117	25	5	5.7385	3.4503	2.6336
117.5	25	5	5.8076	3.4723	2.6723
118	25	5	5.8468	3.4925	2.6942
118.5	25	5	5.726	3.4728	2.6266
119	25	5	5.606	3.4174	2.5593
119.5	25	5	5.4191	3.3346	2.4547
120	25	5	5.2443	3.2456	2.3568
120.5	25	5	5.1711	3.1748	2.3158
121	25	5	5.1555	3.1223	2.3071
100	25.5	5	5.2178	3.2235	2.342
100.5	25.5	5	5.385	3.258	2.4356
101	25.5	5	5.3707	3.2852	2.4276
101.5	25.5	5	5.4829	3.3464	2.4904
102	25.5	5	5.5509	3.3287	2.5285
102.5	25.5	5	5.5459	3.3706	2.5257
103	25.5	5	5.4773	3.3381	2.4873
103.5	25.5	5	5.4722	3.3676	2.4845
104	25.5	5	5.3861	3.337	2.4362
104.5	25.5	5	5.4489	3.3225	2.4714
105	25.5	5	5.6062	3.3723	2.5595
105.5	25.5	5	5.6021	3.394	2.5572
106	25.5	5	5.6608	3.4159	2.59
106.5	25.5	5	5.6467	3.4203	2.5821
107	25.5	5	5.6037	3.4296	2.5581
107.5	25.5	5	5.5567	3.4244	2.5317
108	25.5	5	5.6037	3.4453	2.5581
108.5	25.5	5	5.6107	3.4535	2.562
109	25.5	5	5.6101	3.4779	2.5616
109.5	25.5	5	5.5316	3.4811	2.5177
110	25.5	5	5.5116	3.4647	2.5065
110.5	25.5	5	5.5851	3.4666	2.5476
111	25.5	5	5.6295	3.4806	2.5725
111.5	25.5	5	5.5913	3.4875	2.5511
112	25.5	5	5.5753	3.4683	2.5422
112.5	25.5	5	5.6081	3.4763	2.5605
113	25.5	5	5.6704	3.4834	2.5954
113.5	25.5	5	5.671	3.4756	2.5957
114	25.5	5	5.7035	3.476	2.614
114.5	25.5	5	5.7217	3.459	2.6242
115	25.5	5	5.765	3.4492	2.6484
115.5	25.5	5	5.7659	3.4542	2.6489
116	25.5	5	5.7242	3.4564	2.6255
116.5	25.5	5	5.6925	3.4489	2.6078
117	25.5	5	5.7028	3.4396	2.6136
117.5	25.5	5	5.7889	3.4661	2.6618
118	25.5	5	5.8508	3.5036	2.6964
118.5	25.5	5	5.8205	3.4865	2.6795
119	25.5	5	5.8272	3.4946	2.6833
119.5	25.5	5	5.797	3.4378	2.6663
120	25.5	5	5.4295	3.3322	2.4605
120.5	25.5	5	5.2834	3.2493	2.3787
121	25.5	5	5.2917	3.2045	2.3834
100	26	5	5.4641	3.2654	2.4799
100.5	26	5	5.5128	3.2953	2.5072
101	26	5	5.5202	3.3277	2.5113
101.5	26	5	5.6021	3.3619	2.5572
102	26	5	5.6795	3.3739	2.6005
102.5	26	5	5.567	3.3572	2.5375
103	26	5	5.5857	3.3657	2.548
103.5	26	5	5.5754	3.3875	2.5422
104	26	5	5.4501	3.378	2.472
104.5	26	5	5.4795	3.3329	2.4885
105	26	5	5.52	3.3282	2.5112
105.5	26	5	5.4841	3.301	2.4911
106	26	5	5.6039	3.3721	2.5582
106.5	26	5	5.7024	3.4125	2.6134
107	26	5	5.6569	3.4149	2.5878
107.5	26	5	5.5299	3.419	2.5168
108	26	5	5.5934	3.4474	2.5523
108.5	26	5	5.662	3.4912	2.5907
109	26	5	5.6825	3.5027	2.6022
109.5	26	5	5.6223	3.5032	2.5685
110	26	5	5.5434	3.4607	2.5243
110.5	26	5	5.5696	3.4567	2.539
111	26	5	5.5964	3.461	2.554
111.5	26	5	5.58	3.4495	2.5448
112	26	5	5.5766	3.44	2.5429
112.5	26	5	5.6194	3.4671	2.5669
113	26	5	5.6601	3.4975	2.5897
113.5	26	5	5.6399	3.4803	2.5784
114	26	5	5.6156	3.4864	2.5647
114.5	26	5	5.6853	3.4759	2.6038
115	26	5	5.6865	3.4615	2.6044
115.5	26	5	5.6923	3.4539	2.6077
116	26	5	5.7217	3.4467	2.6241
116.5	26	5	5.6737	3.4335	2.5973
117	26	5	5.6916	3.43	2.6073
117.5	26	5	5.7744	3.4684	2.6537
118	26	5	5.8806	3.5183	2.7132
118.5	26	5	5.8825	3.5208	2.7142
119	26	5	5.8628	3.4854	2.7031
119.5	26	5	5.7978	3.4845	2.6668
120	26	5	5.5687	3.4212	2.5385
120.5	26	5	5.4147	3.3403	2.4522
121	26	5	5.3828	3.279	2.4344
100	26.5	5	5.4161	3.2614	2.453
100.5	26.5	5	5.5234	3.2859	2.5131
101	26.5	5	5.7816	3.3614	2.6577
101.5	26.5	5	5.8875	3.4179	2.717
102	26.5	5	5.8314	3.4318	2.6856
102.5	26.5	5	5.7226	3.4017	2.6247
103	26.5	5	5.5836	3.3635	2.5468
103.5	26.5	5	5.6365	3.3977	2.5764
104	26.5	5	5.5088	3.4115	2.5049
104.5	26.5	5	5.5295	3.3692	2.5165
105	26.5	5	5.4622	3.3247	2.4788
105.5	26.5	5	5.4953	3.339	2.4974
106	26.5	5	5.4977	3.3953	2.4987
106.5	26.5	5	5.528	3.4161	2.5157
107	26.5	5	5.5973	3.4132	2.5545
107.5	26.5	5	5.5603	3.4287	2.5338
108	26.5	5	5.5901	3.4243	2.5505
108.5	26.5	5	5.7108	3.4925	2.618
109	26.5	5	5.7003	3.5141	2.6122
109.5	26.5	5	5.6929	3.5193	2.608
110	26.5	5	5.6205	3.4968	2.5675
110.5	26.5	5	5.5655	3.4635	2.5367
111	26.5	5	5.5413	3.4373	2.5231
111.5	26.5	5	5.5732	3.4203	2.541
112	26.5	5	5.5678	3.4223	2.5379
112.5	26.5	5	5.6353	3.4472	2.5758
113	26.5	5	5.6064	3.4369	2.5596
113.5	26.5	5	5.5897	3.4416	2.5502
114	26.5	5	5.6068	3.4779	2.5598
114.5	26.5	5	5.6283	3.4768	2.5718
115	26.5	5	5.612	3.4462	2.5627
115.5	26.5	5	5.6521	3.4527	2.5852
116	26.5	5	5.6793	3.4438	2.6004
116.5	26.5	5	5.6991	3.4388	2.6115
117	26.5	5	5.7462	3.4569	2.6379
117.5	26.5	5	5.7866	3.5062	2.6605
118	26.5	5	5.8819	3.5332	2.7139
118.5	26.5	5	5.8682	3.5341	2.7062
119	26.5	5	5.828	3.488	2.6837
119.5	26.5	5	5.8003	3.5065	2.6682
120	26.5	5	5.7242	3.4864	2.6256
120.5	26.5	5	5.55	3.4139	2.528
121	26.5	5	5.4498	3.3387	2.4719
100	27	5	5.5514	3.2905	2.5288
100.5	27	5	5.4602	3.2326	2.4777
101	27	5	5.4975	3.2707	2.4986
101.5	27	5	5.7714	3.366	2.652
102	27	5	5.8005	3.4058	2.6683
102.5	27	5	5.6701	3.3885	2.5952
103	27	5	5.7111	3.3834	2.6182
103.5	27	5	5.7869	3.4112	2.6607
104	27	5	5.6778	3.3994	2.5996
104.5	27	5	5.6167	3.421	2.5653
105	27	5	5.5655	3.411	2.5367
105.5	27	5	5.6276	3.4131	2.5715
106	27	5	5.6673	3.4356	2.5937
106.5	27	5	5.5974	3.3904	2.5545
107	27	5	5.6047	3.3597	2.5587
107.5	27	5	5.5783	3.3918	2.5438
108	27	5	5.6202	3.4195	2.5673
108.5	27	5	5.6935	3.4655	2.6084
109	27	5	5.796	3.5088	2.6658
109.5	27	5	5.7435	3.518	2.6363
110	27	5	5.6887	3.5069	2.6057
110.5	27	5	5.6161	3.4706	2.565
111	27	5	5.5601	3.451	2.5337
111.5	27	5	5.5299	3.4301	2.5168
112	27	5	5.5265	3.4207	2.5149
112.5	27	5	5.5474	3.4144	2.5265
113	27	5	5.5366	3.4116	2.5205
113.5	27	5	5.5365	3.4221	2.5204
114	27	5	5.5977	3.4668	2.5547
114.5	27	5	5.5572	3.4404	2.532
115	27	5	5.5839	3.4242	2.547
115.5	27	5	5.6615	3.4529	2.5904
116	27	5	5.6706	3.4657	2.5955
116.5	27	5	5.6241	3.4533	2.5695
117	27	5	5.6379	3.4587	2.5772
117.5	27	5	5.7395	3.5187	2.6341
118	27	5	5.7887	3.5378	2.6617
118.5	27	5	5.8016	3.5451	2.6689
119	27	5	5.6914	3.465	2.6072
119.5	27	5	5.792	3.4874	2.6635
120	27	5	5.7615	3.4937	2.6464
120.5	27	5	5.6535	3.4511	2.586
121	27	5	5.507	3.3786	2.5039
100	27.5	5	5.5449	3.3094	2.5251
100.5	27.5	5	5.3966	3.247	2.4421
101	27.5	5	5.5496	3.2631	2.5278
101.5	27.5	5	5.6422	3.2687	2.5796
102	27.5	5	5.6626	3.3189	2.5911
102.5	27.5	5	5.5717	3.3267	2.5402
103	27.5	5	5.6479	3.3795	2.5828
103.5	27.5	5	5.6588	3.4124	2.5889
104	27.5	5	5.712	3.4064	2.6187
104.5	27.5	5	5.6991	3.4256	2.6115
105	27.5	5	5.6494	3.445	2.5837
105.5	27.5	5	5.6465	3.4474	2.5821
106	27.5	5	5.6731	3.4427	2.597
106.5	27.5	5	5.7312	3.4569	2.6295
107	27.5	5	5.6524	3.3983	2.5854
107.5	27.5	5	5.5976	3.4096	2.5546
108	27.5	5	5.6153	3.4247	2.5646
108.5	27.5	5	5.6437	3.4519	2.5804
109	27.5	5	5.7403	3.5191	2.6346
109.5	27.5	5	5.7129	3.5034	2.6192
110	27.5	5	5.6933	3.5062	2.6082
110.5	27.5	5	5.6309	3.4792	2.5733
111	27.5	5	5.5617	3.4603	2.5345
111.5	27.5	5	5.5058	3.4146	2.5032
112	27.5	5	5.5655	3.4122	2.5366
112.5	27.5	5	5.5332	3.4078	2.5186
113	27.5	5	5.5457	3.4297	2.5256
113.5	27.5	5	5.5685	3.4396	2.5383
114	27.5	5	5.5988	3.4484	2.5553
114.5	27.5	5	5.5568	3.4393	2.5318
115	27.5	5	5.6305	3.4453	2.5731
115.5	27.5	5	5.6516	3.4487	2.5849
116	27.5	5	5.647	3.4739	2.5823
116.5	27.5	5	5.6348	3.4627	2.5755
117	27.5	5	5.6508	3.4641	2.5844
117.5	27.5	5	5.6963	3.5271	2.6099
118	27.5	5	5.7433	3.5304	2.6362
118.5	27.5	5	5.7369	3.5087	2.6327
119	27.5	5	5.7609	3.4735	2.6461
119.5	27.5	5	5.7609	3.4787	2.6461
120	27.5	5	5.7787	3.4949	2.6561
120.5	27.5	5	5.7861	3.4709	2.6602
121	27.5	5	5.6135	3.403	2.5636
100	28	5	5.4512	3.3166	2.4727
100.5	28	5	5.5341	3.3432	2.5191
101	28	5	5.5202	3.2984	2.5113
101.5	28	5	5.5942	3.3412	2.5528
102	28	5	5.7553	3.402	2.6429
102.5	28	5	5.5063	3.288	2.5035
103	28	5	5.5318	3.3107	2.5178
103.5	28	5	5.6956	3.4057	2.6096
104	28	5	5.6085	3.385	2.5608
104.5	28	5	5.6845	3.3966	2.6033
105	28	5	5.6301	3.3634	2.5729
105.5	28	5	5.5829	3.338	2.5464
106	28	5	5.6059	3.3742	2.5593
106.5	28	5	5.6046	3.4325	2.5586
107	28	5	5.6212	3.4338	2.5678
107.5	28	5	5.6044	3.4509	2.5585
108	28	5	5.6403	3.4521	2.5785
108.5	28	5	5.6646	3.4626	2.5922
109	28	5	5.723	3.5028	2.6249
109.5	28	5	5.816	3.544	2.677
110	28	5	5.755	3.5173	2.6428
110.5	28	5	5.6928	3.4959	2.6079
111	28	5	5.614	3.4503	2.5638
111.5	28	5	5.5556	3.4115	2.5311
112	28	5	5.5395	3.4124	2.5221
112.5	28	5	5.6212	3.4282	2.5678
113	28	5	5.5866	3.4425	2.5485
113.5	28	5	5.5904	3.4591	2.5506
114	28	5	5.5812	3.4455	2.5455
114.5	28	5	5.5645	3.4636	2.5361
115	28	5	5.5925	3.4345	2.5518
115.5	28	5	5.6183	3.4366	2.5663
116	28	5	5.655	3.4518	2.5868
116.5	28	5	5.6453	3.4643	2.5814
117	28	5	5.663	3.4759	2.5913
117.5	28	5	5.6558	3.4981	2.5872
118	28	5	5.6827	3.4997	2.6023
118.5	28	5	5.6767	3.4829	2.5989
119	28	5	5.7297	3.5191	2.6286
119.5	28	5	5.7269	3.4688	2.6271
120	28	5	5.7623	3.497	2.6469
120.5	28	5	5.7647	3.4926	2.6482
121	28	5	5.6567	3.4309	2.5878
100	28.5	5	5.3765	3.334	2.4309
100.5	28.5	5	5.4027	3.3583	2.4455
101	28.5	5	5.4475	3.3228	2.4706
101.5	28.5	5	5.5649	3.3573	2.5363
102	28.5	5	5.7318	3.4048	2.6298
102.5	28.5	5	5.5559	3.3577	2.5313
103	28.5	5	5.5922	3.3466	2.5517
103.5	28.5	5	5.5991	3.3697	2.5555
104	28.5	5	5.5848	3.3327	2.5475
104.5	28.5	5	5.5207	3.2323	2.5116
105	28.5	5	5.4582	3.1808	2.4766
105.5	28.5	5	5.4919	3.1469	2.4954
106	28.5	5	5.4549	3.1619	2.4747
106.5	28.5	5	5.5016	3.2891	2.5009
107	28.5	5	5.5531	3.3996	2.5297
107.5	28.5	5	5.5695	3.4236	2.5389
108	28.5	5	5.6252	3.444	2.5701
108.5	28.5	5	5.6876	3.481	2.6051
109	28.5	5	5.7071	3.5008	2.616
109.5	28.5	5	5.7236	3.5046	2.6252
110	28.5	5	5.8593	3.5178	2.7012
110.5	28.5	5	5.7638	3.504	2.6477
111	28.5	5	5.6689	3.4969	2.5946
111.5	28.5	5	5.5951	3.492	2.5533
112	28.5	5	5.6016	3.4852	2.5569
112.5	28.5	5	5.5616	3.4265	2.5345
113	28.5	5	5.5753	3.4158	2.5422
113.5	28.5	5	5.6409	3.4607	2.5789
114	28.5	5	5.635	3.4392	2.5756
114.5	28.5	5	5.5799	3.4506	2.5447
115	28.5	5	5.6278	3.4674	2.5715
115.5	28.5	5	5.633	3.4574	2.5745
116	28.5	5	5.58	3.4479	2.5448
116.5	28.5	5	5.5645	3.4482	2.5361
117	28.5	5	5.5812	3.458	2.5455
117.5	28.5	5	5.6145	3.4895	2.5641
118	28.5	5	5.6182	3.4804	2.5662
118.5	28.5	5	5.6501	3.4678	2.584
119	28.5	5	5.6807	3.5002	2.6012
119.5	28.5	5	5.6459	3.4722	2.5817
120	28.5	5	5.7114	3.4855	2.6184
120.5	28.5	5	5.7294	3.4865	2.6284
121	28.5	5	5.6969	3.4533	2.6103
100	29	5	5.4923	3.3947	2.4957
100.5	29	5	5.3598	3.3832	2.4215
101	29	5	5.4373	3.3678	2.4649
101.5	29	5	5.5374	3.3482	2.5209
102	29	5	5.6598	3.3676	2.5895
102.5	29	5	5.7214	3.3887	2.624
103	29	5	5.6828	3.3689	2.6024
103.5	29	5	5.6297	3.335	2.5726
104	29	5	5.7187	3.2221	2.6225
104.5	29	5	5.5606	3.1214	2.5339
105	29	5	5.4	2.9842	2.444
105.5	29	5	5.4019	2.9964	2.4451
106	29	5	5.4196	3.0642	2.455
106.5	29	5	5.4618	3.1535	2.4786
107	29	5	5.4604	3.3008	2.4778
107.5	29	5	5.5421	3.4072	2.5236
108	29	5	5.5677	3.4238	2.5379
108.5	29	5	5.619	3.4613	2.5667
109	29	5	5.6584	3.4758	2.5887
109.5	29	5	5.6569	3.4623	2.5879
110	29	5	5.6584	3.4485	2.5887
110.5	29	5	5.6971	3.4518	2.6104
111	29	5	5.6656	3.4747	2.5928
111.5	29	5	5.6115	3.4707	2.5624
112	29	5	5.5636	3.4271	2.5356
112.5	29	5	5.5423	3.3952	2.5237
113	29	5	5.5287	3.3931	2.5161
113.5	29	5	5.6034	3.4345	2.5579
114	29	5	5.6435	3.4432	2.5804
114.5	29	5	5.609	3.4469	2.561
115	29	5	5.6848	3.4691	2.6035
115.5	29	5	5.7142	3.4709	2.6199
116	29	5	5.6383	3.4561	2.5775
116.5	29	5	5.5667	3.4254	2.5374
117	29	5	5.5965	3.4475	2.554
117.5	29	5	5.6329	3.4848	2.5744
118	29	5	5.6874	3.5041	2.605
118.5	29	5	5.6998	3.4969	2.6119
119	29	5	5.7052	3.4927	2.6149
119.5	29	5	5.6819	3.4676	2.6019
120	29	5	5.6727	3.48	2.5967
120.5	29	5	5.7118	3.4836	2.6186
121	29	5	5.7153	3.4847	2.6206
100	29.5	5	5.321	3.3651	2.3997
100.5	29.5	5	5.4542	3.395	2.4743
101	29.5	5	5.5962	3.4266	2.5539
101.5	29.5	5	5.5369	3.3935	2.5206
102	29.5	5	5.6167	3.4113	2.5654
102.5	29.5	5	5.7707	3.3796	2.6516
103	29.5	5	5.7441	3.3638	2.6367
103.5	29.5	5	5.5962	3.2709	2.5539
104	29.5	5	5.6475	3.2191	2.5826
104.5	29.5	5	5.654	3.1207	2.5862
105	29.5	5	5.5868	3.1291	2.5486
105.5	29.5	5	5.5167	3.0319	2.5093
106	29.5	5	5.5603	3.1531	2.5337
106.5	29.5	5	5.476	3.115	2.4866
107	29.5	5	5.4506	3.1679	2.4724
107.5	29.5	5	5.4931	3.2903	2.4962
108	29.5	5	5.5634	3.3687	2.5355
108.5	29.5	5	5.6035	3.4426	2.558
109	29.5	5	5.6135	3.4462	2.5636
109.5	29.5	5	5.6122	3.4372	2.5628
110	29.5	5	5.6182	3.4266	2.5662
110.5	29.5	5	5.6284	3.4146	2.5719
111	29.5	5	5.6235	3.4149	2.5692
111.5	29.5	5	5.5739	3.4023	2.5414
112	29.5	5	5.5898	3.4051	2.5503
112.5	29.5	5	5.5853	3.3706	2.5478
113	29.5	5	5.5756	3.3536	2.5423
113.5	29.5	5	5.5744	3.3814	2.5417
114	29.5	5	5.6049	3.3996	2.5588
114.5	29.5	5	5.6009	3.4254	2.5565
115	29.5	5	5.6971	3.431	2.6104
115.5	29.5	5	5.7871	3.4545	2.6608
116	29.5	5	5.6616	3.3994	2.5905
116.5	29.5	5	5.6317	3.4205	2.5737
117	29.5	5	5.6648	3.4616	2.5923
117.5	29.5	5	5.704	3.4952	2.6142
118	29.5	5	5.712	3.512	2.6187
118.5	29.5	5	5.7869	3.5294	2.6607
119	29.5	5	5.7452	3.5185	2.6373
119.5	29.5	5	5.782	3.5043	2.6579
120	29.5	5	5.7222	3.5045	2.6244
120.5	29.5	5	5.6828	3.4813	2.6023
121	29.5	5	5.6595	3.4567	2.5893
100	30	5	5.4372	3.3487	2.4649
100.5	30	5	5.5022	3.3773	2.5012
101	30	5	5.6411	3.415	2.579
101.5	30	5	5.6325	3.4107	2.5742
102	30	5	5.6288	3.4186	2.5721
102.5	30	5	5.7751	3.3952	2.6541
103	30	5	5.4919	3.2516	2.4955
103.5	30	5	5.5585	3.1309	2.5328
104	30	5	5.4213	2.9951	2.4559
104.5	30	5	5.6429	3.1603	2.58
105	30	5	5.6279	3.0887	2.5716
105.5	30	5	5.4771	2.9671	2.4872
106	30	5	5.5458	3.0873	2.5256
106.5	30	5	5.5419	3.152	2.5235
107	30	5	5.4557	3.1343	2.4752
107.5	30	5	5.3808	3.1263	2.4333
108	30	5	5.4201	3.2092	2.4553
108.5	30	5	5.4985	3.2749	2.4992
109	30	5	5.6058	3.3708	2.5593
109.5	30	5	5.6097	3.4235	2.5614
110	30	5	5.5753	3.4341	2.5422
110.5	30	5	5.6237	3.46	2.5692
111	30	5	5.6194	3.4133	2.5669
111.5	30	5	5.4765	3.3414	2.4868
112	30	5	5.3433	3.2558	2.4122
112.5	30	5	5.3442	3.2033	2.4128
113	30	5	5.4405	3.2506	2.4667
113.5	30	5	5.5081	3.2993	2.5045
114	30	5	5.6017	3.3639	2.557
114.5	30	5	5.7126	3.4401	2.619
115	30	5	5.8237	3.493	2.6812
115.5	30	5	5.8492	3.4627	2.6955
116	30	5	5.6636	3.3655	2.5916
116.5	30	5	5.6101	3.369	2.5617
117	30	5	5.6672	3.4447	2.5936
117.5	30	5	5.7165	3.5106	2.6212
118	30	5	5.6853	3.5083	2.6038
118.5	30	5	5.7591	3.5308	2.6451
119	30	5	5.7536	3.5352	2.642
119.5	30	5	5.7405	3.513	2.6347
120	30	5	5.6903	3.4774	2.6065
120.5	30	5	5.6073	3.4155	2.5601
121	30	5	5.559	3.4126	2.533
100	30.5	5	5.4387	3.3614	2.4657
100.5	30.5	5	5.4537	3.367	2.4741
101	30.5	5	5.6238	3.4047	2.5693
101.5	30.5	5	5.6216	3.4041	2.5681
102	30.5	5	5.5003	3.3945	2.5002
102.5	30.5	5	5.6704	3.3966	2.5955
103	30.5	5	5.5674	3.285	2.5377
103.5	30.5	5	5.4912	3.1015	2.4951
104	30.5	5	5.3683	2.9715	2.4263
104.5	30.5	5	5.3985	2.9923	2.4432
105	30.5	5	5.3855	2.8609	2.4359
105.5	30.5	5	5.5	2.9271	2.5
106	30.5	5	5.5743	3.1028	2.5416
106.5	30.5	5	5.557	3.1366	2.5319
107	30.5	5	5.3793	3.0966	2.4324
107.5	30.5	5	5.3238	3.0773	2.4013
108	30.5	5	5.2829	3.0437	2.3784
108.5	30.5	5	5.38	3.1516	2.4328
109	30.5	5	5.5324	3.2862	2.5181
109.5	30.5	5	5.5691	3.3712	2.5387
110	30.5	5	5.625	3.4087	2.57
110.5	30.5	5	5.6064	3.4144	2.5596
111	30.5	5	5.6959	3.4411	2.6097
111.5	30.5	5	5.5234	3.3164	2.5131
112	30.5	5	5.3379	3.1953	2.4092
112.5	30.5	5	5.3279	3.1847	2.4036
113	30.5	5	5.3315	3.213	2.4056
113.5	30.5	5	5.3798	3.2756	2.4327
114	30.5	5	5.5722	3.369	2.5404
114.5	30.5	5	5.7146	3.4378	2.6202
115	30.5	5	5.861	3.501	2.7022
115.5	30.5	5	5.8848	3.4767	2.7155
116	30.5	5	5.7751	3.4203	2.654
116.5	30.5	5	5.6752	3.3956	2.5981
117	30.5	5	5.7016	3.4123	2.6129
117.5	30.5	5	5.7278	3.4575	2.6276
118	30.5	5	5.6941	3.4827	2.6087
118.5	30.5	5	5.6469	3.4436	2.5823
119	30.5	5	5.6756	3.4684	2.5983
119.5	30.5	5	5.7081	3.4936	2.6165
120	30.5	5	5.6821	3.428	2.602
120.5	30.5	5	5.5237	3.3576	2.5133
121	30.5	5	5.482	3.3449	2.4899
100	31	5	5.424	3.3654	2.4574
100.5	31	5	5.4381	3.3448	2.4653
101	31	5	5.4731	3.3613	2.4849
101.5	31	5	5.4974	3.3797	2.4986
102	31	5	5.5117	3.3914	2.5065
102.5	31	5	5.4431	3.3763	2.4682
103	31	5	5.3226	3.3373	2.4006
103.5	31	5	5.4312	3.2132	2.4615
104	31	5	5.3875	3.0198	2.437
104.5	31	5	5.2637	2.942	2.3677
105	31	5	5.333	2.9277	2.4065
105.5	31	5	5.4454	2.9714	2.4694
106	31	5	5.4765	3.0403	2.4868
106.5	31	5	5.5093	3.0676	2.5052
107	31	5	5.3087	3.0416	2.3929
107.5	31	5	5.2754	3.0548	2.3742
108	31	5	5.235	3.0367	2.3516
108.5	31	5	5.3439	3.1556	2.4126
109	31	5	5.4708	3.2251	2.4836
109.5	31	5	5.5999	3.3359	2.5559
110	31	5	5.7411	3.3898	2.635
110.5	31	5	5.8174	3.4264	2.6778
111	31	5	5.7807	3.4588	2.6572
111.5	31	5	5.6821	3.4166	2.602
112	31	5	5.4993	3.288	2.4996
112.5	31	5	5.4564	3.2883	2.4756
113	31	5	5.4651	3.3212	2.4805
113.5	31	5	5.4791	3.3372	2.4883
114	31	5	5.6223	3.4122	2.5685
114.5	31	5	5.7207	3.4434	2.6236
115	31	5	5.7731	3.4743	2.6529
115.5	31	5	5.8063	3.4356	2.6715
116	31	5	5.8599	3.4491	2.7015
116.5	31	5	5.7214	3.4165	2.624
117	31	5	5.6882	3.3916	2.6054
117.5	31	5	5.7016	3.3766	2.6129
118	31	5	5.5922	3.3497	2.5516
118.5	31	5	5.4828	3.3114	2.4903
119	31	5	5.5439	3.347	2.5246
119.5	31	5	5.5819	3.3964	2.5459
120	31	5	5.5217	3.3805	2.5121
120.5	31	5	5.449	3.3026	2.4714
121	31	5	5.4784	3.303	2.4879
100	31.5	5	5.4147	3.3738	2.4522
100.5	31.5	5	5.4068	3.3508	2.4478
101	31.5	5	5.4548	3.3385	2.4747
101.5	31.5	5	5.5255	3.3731	2.5143
102	31.5	5	5.6294	3.4176	2.5724
102.5	31.5	5	5.6458	3.4061	2.5817
103	31.5	5	5.6292	3.389	2.5724
103.5	31.5	5	5.5139	3.3626	2.5078
104	31.5	5	5.5961	3.2446	2.5538
104.5	31.5	5	5.3751	3.0336	2.4301
105	31.5	5	5.3744	3.002	2.4297
105.5	31.5	5	5.402	2.9755	2.4451
106	31.5	5	5.4274	3.0245	2.4593
106.5	31.5	5	5.3712	2.9761	2.4279
107	31.5	5	5.2847	3.0133	2.3794
107.5	31.5	5	5.3057	3.0802	2.3912
108	31.5	5	5.3285	3.1509	2.404
108.5	31.5	5	5.337	3.188	2.4087
109	31.5	5	5.4793	3.241	2.4884
109.5	31.5	5	5.6074	3.3144	2.5601
110	31.5	5	5.8227	3.3969	2.6807
110.5	31.5	5	5.8689	3.4468	2.7066
111	31.5	5	5.9233	3.5072	2.737
111.5	31.5	5	5.7837	3.4713	2.6589
112	31.5	5	5.6365	3.3863	2.5765
112.5	31.5	5	5.5778	3.3694	2.5436
113	31.5	5	5.6601	3.4033	2.5897
113.5	31.5	5	5.72	3.4218	2.6232
114	31.5	5	5.6793	3.4381	2.6004
114.5	31.5	5	5.7668	3.4691	2.6494
115	31.5	5	5.7767	3.464	2.6549
115.5	31.5	5	5.8292	3.4456	2.6844
116	31.5	5	5.8833	3.4511	2.7146
116.5	31.5	5	5.6585	3.3925	2.5888
117	31.5	5	5.6006	3.316	2.5563
117.5	31.5	5	5.6124	3.3301	2.5629
118	31.5	5	5.5778	3.3471	2.5436
118.5	31.5	5	5.496	3.3063	2.4978
119	31.5	5	5.5138	3.3107	2.5077
119.5	31.5	5	5.4891	3.3151	2.4939
120	31.5	5	5.4522	3.2917	2.4733
120.5	31.5	5	5.3839	3.2605	2.435
121	31.5	5	5.3535	3.2216	2.4179
100	32	5	5.3125	3.3462	2.395
100.5	32	5	5.3586	3.339	2.4208
101	32	5	5.3991	3.3469	2.4435
101.5	32	5	5.485	3.3627	2.4916
102	32	5	5.6272	3.3921	2.5713
102.5	32	5	5.6703	3.3786	2.5954
103	32	5	5.732	3.401	2.6299
103.5	32	5	5.6677	3.4086	2.5939
104	32	5	5.542	3.3779	2.5236
104.5	32	5	5.5345	3.2736	2.5193
105	32	5	5.7083	3.1973	2.6167
105.5	32	5	5.6144	3.1155	2.564
106	32	5	5.6078	3.1356	2.5604
106.5	32	5	5.5308	3.131	2.5172
107	32	5	5.412	3.1335	2.4507
107.5	32	5	5.4303	3.1768	2.4609
108	32	5	5.4551	3.2466	2.4748
108.5	32	5	5.4118	3.2489	2.4506
109	32	5	5.4549	3.2727	2.4747
109.5	32	5	5.4754	3.2997	2.4863
110	32	5	5.6545	3.3657	2.5865
110.5	32	5	5.7869	3.4176	2.6606
111	32	5	5.7951	3.451	2.6652
111.5	32	5	5.6432	3.4206	2.5802
112	32	5	5.5465	3.3689	2.5261
112.5	32	5	5.5305	3.3436	2.5171
113	32	5	5.6064	3.4178	2.5596
113.5	32	5	5.6208	3.4282	2.5676
114	32	5	5.6776	3.4338	2.5994
114.5	32	5	5.7274	3.4451	2.6273
115	32	5	5.7196	3.4034	2.623
115.5	32	5	5.7941	3.3986	2.6647
116	32	5	5.8	3.3747	2.668
116.5	32	5	5.6159	3.3341	2.5649
117	32	5	5.4896	3.2999	2.4942
117.5	32	5	5.5389	3.3139	2.5218
118	32	5	5.5821	3.3566	2.5459
118.5	32	5	5.5992	3.3379	2.5556
119	32	5	5.465	3.2909	2.4804
119.5	32	5	5.4578	3.2596	2.4764
120	32	5	5.362	3.1965	2.4227
120.5	32	5	5.3605	3.1738	2.4219
121	32	5	5.3633	3.1477	2.4235
100	32.5	5	5.2733	3.3469	2.373
100.5	32.5	5	5.3507	3.3545	2.4164
101	32.5	5	5.4345	3.3597	2.4633
101.5	32.5	5	5.3891	3.3259	2.4379
102	32.5	5	5.4461	3.3304	2.4698
102.5	32.5	5	5.4861	3.328	2.4922
103	32.5	5	5.5524	3.3322	2.5293
103.5	32.5	5	5.5912	3.3451	2.5511
104	32.5	5	5.5775	3.3846	2.5434
104.5	32.5	5	5.6495	3.3884	2.5837
105	32.5	5	5.8457	3.3943	2.6936
105.5	32.5	5	5.7159	3.3465	2.6209
106	32.5	5	5.7454	3.3315	2.6374
106.5	32.5	5	5.8395	3.3512	2.6901
107	32.5	5	5.7898	3.3601	2.6623
107.5	32.5	5	5.7521	3.3668	2.6412
108	32.5	5	5.676	3.3565	2.5986
108.5	32.5	5	5.6014	3.3555	2.5568
109	32.5	5	5.5235	3.3369	2.5132
109.5	32.5	5	5.4578	3.3289	2.4764
110	32.5	5	5.5185	3.3532	2.5104
110.5	32.5	5	5.6758	3.398	2.5984
111	32.5	5	5.7017	3.4242	2.613
111.5	32.5	5	5.588	3.3952	2.5493
112	32.5	5	5.4555	3.3237	2.4751
112.5	32.5	5	5.4717	3.3205	2.4842
113	32.5	5	5.5627	3.3894	2.5351
113.5	32.5	5	5.6362	3.3844	2.5762
114	32.5	5	5.6184	3.3845	2.5663
114.5	32.5	5	5.5602	3.3401	2.5337
115	32.5	5	5.569	3.292	2.5387
115.5	32.5	5	5.6521	3.3058	2.5852
116	32.5	5	5.7212	3.3092	2.6239
116.5	32.5	5	5.6631	3.3366	2.5914
117	32.5	5	5.5317	3.3358	2.5177
117.5	32.5	5	5.5096	3.323	2.5054
118	32.5	5	5.5393	3.3551	2.522
118.5	32.5	5	5.5337	3.3039	2.5189
119	32.5	5	5.3942	3.2002	2.4408
119.5	32.5	5	5.322	3.1527	2.4003
120	32.5	5	5.1986	3.0878	2.3312
120.5	32.5	5	5.0903	3.0315	2.2706
121	32.5	5	5.1684	3.0312	2.3143
100	33	5	5.2505	3.3467	2.3603
100.5	33	5	5.3598	3.3777	2.4215
101	33	5	5.3542	3.3613	2.4184
101.5	33	5	5.3369	3.3151	2.4086
102	33	5	5.382	3.2919	2.4339
102.5	33	5	5.3868	3.2982	2.4366
103	33	5	5.4486	3.2905	2.4712
103.5	33	5	5.5206	3.2699	2.5115
104	33	5	5.6901	3.3603	2.6065
104.5	33	5	5.7071	3.3959	2.616
105	33	5	5.8342	3.4435	2.6872
105.5	33	5	5.9105	3.4841	2.7299
106	33	5	5.878	3.4836	2.7117
106.5	33	5	5.924	3.4577	2.7374
107	33	5	5.9794	3.4823	2.7685
107.5	33	5	6.0153	3.4884	2.7844
108	33	5	5.9068	3.4828	2.7278
108.5	33	5	5.737	3.4484	2.6327
109	33	5	5.6221	3.4041	2.5684
109.5	33	5	5.5607	3.3776	2.534
110	33	5	5.6158	3.4006	2.5648
110.5	33	5	5.7239	3.4518	2.6254
111	33	5	5.7272	3.4713	2.6273
111.5	33	5	5.6336	3.4415	2.5748
112	33	5	5.6067	3.4118	2.5597
112.5	33	5	5.5112	3.3584	2.5063
113	33	5	5.5803	3.3847	2.545
113.5	33	5	5.5965	3.3629	2.5541
114	33	5	5.4476	3.2816	2.4707
114.5	33	5	5.3858	3.2056	2.4361
115	33	5	5.3901	3.1503	2.4385
115.5	33	5	5.4551	3.1774	2.4749
116	33	5	5.5512	3.2315	2.5287
116.5	33	5	5.5604	3.2776	2.5338
117	33	5	5.5207	3.335	2.5116
117.5	33	5	5.5168	3.354	2.5094
118	33	5	5.5266	3.3582	2.5149
118.5	33	5	5.4805	3.2966	2.4891
119	33	5	5.2385	3.165	2.3535
119.5	33	5	5.1702	3.1012	2.3153
120	33	5	5.1567	3.04	2.3077
120.5	33	5	5.1486	3.005	2.3032
121	33	5	5.2198	3.0005	2.3431
100	33.5	5	5.2674	3.3777	2.3698
100.5	33.5	5	5.2991	3.369	2.3875
101	33.5	5	5.3294	3.3396	2.4045
101.5	33.5	5	5.3319	3.311	2.4059
102	33.5	5	5.3859	3.3041	2.4361
102.5	33.5	5	5.3686	3.2837	2.4264
103	33.5	5	5.3752	3.2679	2.4301
103.5	33.5	5	5.5144	3.3163	2.508
104	33.5	5	5.74	3.3561	2.6344
104.5	33.5	5	5.8541	3.3835	2.6983
105	33.5	5	5.6489	3.3853	2.5834
105.5	33.5	5	5.8455	3.449	2.6935
106	33.5	5	5.9078	3.4936	2.7283
106.5	33.5	5	5.8932	3.4633	2.7202
107	33.5	5	5.8729	3.4768	2.7088
107.5	33.5	5	5.9193	3.4908	2.7348
108	33.5	5	5.9493	3.5236	2.7516
108.5	33.5	5	5.8039	3.4697	2.6702
109	33.5	5	5.6461	3.4019	2.5818
109.5	33.5	5	5.6589	3.3963	2.589
110	33.5	5	5.6772	3.407	2.5992
110.5	33.5	5	5.7564	3.4836	2.6436
111	33.5	5	5.7275	3.4734	2.6274
111.5	33.5	5	5.6382	3.4617	2.5774
112	33.5	5	5.5661	3.4214	2.537
112.5	33.5	5	5.5474	3.3863	2.5266
113	33.5	5	5.5516	3.3425	2.5289
113.5	33.5	5	5.4889	3.3075	2.4938
114	33.5	5	5.3878	3.23	2.4372
114.5	33.5	5	5.1765	3.0757	2.3188
115	33.5	5	5.2304	3.0281	2.349
115.5	33.5	5	5.342	3.0755	2.4115
116	33.5	5	5.4751	3.1515	2.486
116.5	33.5	5	5.5703	3.2628	2.5394
117	33.5	5	5.5725	3.3385	2.5406
117.5	33.5	5	5.5369	3.3488	2.5207
118	33.5	5	5.5283	3.35	2.5159
118.5	33.5	5	5.5425	3.3397	2.5238
119	33.5	5	5.4519	3.2768	2.4731
119.5	33.5	5	5.3679	3.1826	2.4261
120	33.5	5	5.2557	3.1164	2.3632
120.5	33.5	5	5.2212	3.0634	2.3439
121	33.5	5	5.2593	3.0383	2.3652
100	34	5	5.3415	3.3891	2.4112
100.5	34	5	5.3759	3.3787	2.4305
101	34	5	5.3405	3.3365	2.4107
101.5	34	5	5.3697	3.3037	2.427
102	34	5	5.402	3.2768	2.4451
102.5	34	5	5.426	3.2686	2.4586
103	34	5	5.4302	3.2649	2.4609
103.5	34	5	5.5385	3.3045	2.5216
104	34	5	5.6754	3.3569	2.5982
104.5	34	5	5.6697	3.3532	2.595
105	34	5	5.7158	3.3746	2.6209
105.5	34	5	5.8337	3.3927	2.6869
106	34	5	5.9226	3.4505	2.7366
106.5	34	5	5.8812	3.4639	2.7135
107	34	5	5.7573	3.4371	2.6441
107.5	34	5	5.777	3.4392	2.6551
108	34	5	5.5978	3.369	2.5548
108.5	34	5	5.4552	3.2636	2.4749
109	34	5	5.4381	3.2437	2.4653
109.5	34	5	5.4321	3.2801	2.4619
110	34	5	5.5694	3.3659	2.5388
110.5	34	5	5.6207	3.3796	2.5676
111	34	5	5.597	3.4123	2.5543
111.5	34	5	5.548	3.3987	2.5269
112	34	5	5.5287	3.3794	2.5161
112.5	34	5	5.5009	3.3553	2.5005
113	34	5	5.4918	3.3227	2.4954
113.5	34	5	5.428	3.2592	2.4597
114	34	5	5.3172	3.1536	2.3977
114.5	34	5	5.3124	3.0463	2.395
115	34	5	5.3433	3.0469	2.4123
115.5	34	5	5.3875	3.0731	2.437
116	34	5	5.4728	3.1243	2.4848
116.5	34	5	5.5455	3.2215	2.5255
117	34	5	5.5741	3.3216	2.5415
117.5	34	5	5.5629	3.3633	2.5352
118	34	5	5.5713	3.3663	2.5399
118.5	34	5	5.6256	3.387	2.5703
119	34	5	5.5899	3.3648	2.5503
119.5	34	5	5.4804	3.2563	2.489
120	34	5	5.4006	3.211	2.4443
120.5	34	5	5.3286	3.1343	2.404
121	34	5	5.3264	3.0845	2.4028
100	34.5	5	5.3216	3.3626	2.4001
100.5	34.5	5	5.4693	3.3931	2.4828
101	34.5	5	5.4668	3.3755	2.4814
101.5	34.5	5	5.402	3.3128	2.4451
102	34.5	5	5.4096	3.3055	2.4494
102.5	34.5	5	5.4133	3.2889	2.4514
103	34.5	5	5.4735	3.2908	2.4852
103.5	34.5	5	5.6363	3.3412	2.5763
104	34.5	5	5.5994	3.3531	2.5556
104.5	34.5	5	5.5713	3.3515	2.5399
105	34.5	5	5.5708	3.3491	2.5397
105.5	34.5	5	5.7	3.3637	2.612
106	34.5	5	5.8076	3.4179	2.6723
106.5	34.5	5	5.7899	3.4136	2.6623
107	34.5	5	5.664	3.3927	2.5919
107.5	34.5	5	5.5874	3.3657	2.5489
108	34.5	5	5.4958	3.3131	2.4976
108.5	34.5	5	5.2978	3.2141	2.3868
109	34.5	5	5.1719	3.1675	2.3163
109.5	34.5	5	5.1174	3.185	2.2857
110	34.5	5	5.2538	3.2381	2.3622
110.5	34.5	5	5.3873	3.2788	2.4369
111	34.5	5	5.4134	3.3304	2.4515
111.5	34.5	5	5.4881	3.3728	2.4933
112	34.5	5	5.5426	3.3594	2.5238
112.5	34.5	5	5.5197	3.3324	2.511
113	34.5	5	5.516	3.3189	2.509
113.5	34.5	5	5.4657	3.2294	2.4808
114	34.5	5	5.2611	3.0907	2.3662
114.5	34.5	5	5.2497	3.0039	2.3599
115	34.5	5	5.3423	3.0294	2.4117
115.5	34.5	5	5.4101	3.0672	2.4496
116	34.5	5	5.459	3.1064	2.477
116.5	34.5	5	5.4984	3.1952	2.4991
117	34.5	5	5.5866	3.307	2.5485
117.5	34.5	5	5.6441	3.3658	2.5807
118	34.5	5	5.6291	3.3628	2.5723
118.5	34.5	5	5.7225	3.3615	2.6246
119	34.5	5	5.7005	3.3746	2.6122
119.5	34.5	5	5.641	3.3265	2.5789
120	34.5	5	5.6129	3.27	2.5632
120.5	34.5	5	5.456	3.1934	2.4754
121	34.5	5	5.4199	3.1439	2.4552
100	35	5	5.3449	3.3296	2.4132
100.5	35	5	5.4007	3.3225	2.4444
101	35	5	5.4597	3.3462	2.4774
101.5	35	5	5.4601	3.336	2.4777
102	35	5	5.4563	3.3143	2.4755
102.5	35	5	5.4323	3.3048	2.4621
103	35	5	5.5097	3.3133	2.5055
103.5	35	5	5.5824	3.3468	2.5461
104	35	5	5.5404	3.3314	2.5226
104.5	35	5	5.5562	3.3262	2.5315
105	35	5	5.5947	3.3426	2.553
105.5	35	5	5.658	3.3667	2.5885
106	35	5	5.6844	3.3911	2.6033
106.5	35	5	5.6947	3.3447	2.609
107	35	5	5.5371	3.2995	2.5208
107.5	35	5	5.5329	3.2835	2.5184
108	35	5	5.5151	3.2853	2.5085
108.5	35	5	5.4722	3.2887	2.4844
109	35	5	5.4173	3.2469	2.4537
109.5	35	5	5.3216	3.2112	2.4001
110	35	5	5.2934	3.2108	2.3843
110.5	35	5	5.3054	3.2244	2.391
111	35	5	5.2704	3.2686	2.3714
111.5	35	5	5.3823	3.3329	2.4341
112	35	5	5.535	3.3613	2.5196
112.5	35	5	5.5086	3.3454	2.5048
113	35	5	5.4457	3.2916	2.4696
113.5	35	5	5.468	3.225	2.4821
114	35	5	5.2623	3.0863	2.3669
114.5	35	5	5.2677	3.0304	2.3699
115	35	5	5.2779	3.0235	2.3756
115.5	35	5	5.3792	3.0592	2.4324
116	35	5	5.4491	3.1113	2.4715
116.5	35	5	5.5142	3.1967	2.508
117	35	5	5.585	3.3081	2.5476
117.5	35	5	5.6994	3.3649	2.6117
118	35	5	5.7611	3.3799	2.6462
118.5	35	5	5.8117	3.376	2.6745
119	35	5	5.8207	3.3806	2.6796
119.5	35	5	5.6604	3.3407	2.5898
120	35	5	5.5441	3.2993	2.5247
120.5	35	5	5.49	3.2442	2.4944
121	35	5	5.4391	3.2056	2.4659
100	18	10	5.6717	3.3601	2.5962
100.5	18	10	5.6692	3.3629	2.5947
101	18	10	5.6672	3.3675	2.5936
101.5	18	10	5.673	3.3715	2.5968
102	18	10	5.6687	3.3729	2.5945
102.5	18	10	5.6842	3.3786	2.6032
103	18	10	5.6876	3.3826	2.605
103.5	18	10	5.6992	3.3965	2.6116
104	18	10	5.7134	3.4154	2.6195
104.5	18	10	5.7272	3.4301	2.6272
105	18	10	5.716	3.434	2.621
105.5	18	10	5.7153	3.4296	2.6206
106	18	10	5.7185	3.4193	2.6224
106.5	18	10	5.7017	3.3904	2.613
107	18	10	5.6763	3.3504	2.5987
107.5	18	10	5.665	3.3226	2.5924
108	18	10	5.6771	3.3192	2.5992
108.5	18	10	5.7305	3.339	2.6291
109	18	10	5.6979	3.3697	2.6108
109.5	18	10	5.7465	3.398	2.638
110	18	10	5.7839	3.4223	2.659
110.5	18	10	5.8215	3.4174	2.6801
111	18	10	5.8937	3.4298	2.7205
111.5	18	10	5.8655	3.4242	2.7047
112	18	10	5.8656	3.422	2.7048
112.5	18	10	5.8551	3.422	2.6989
113	18	10	5.835	3.421	2.6876
113.5	18	10	5.8075	3.4192	2.6722
114	18	10	5.8998	3.436	2.7239
114.5	18	10	5.9042	3.4346	2.7264
115	18	10	5.904	3.4298	2.7262
115.5	18	10	5.9164	3.4338	2.7332
116	18	10	5.9288	3.4464	2.7401
116.5	18	10	5.9343	3.4491	2.7432
117	18	10	5.9319	3.4436	2.7419
117.5	18	10	5.9293	3.4431	2.7404
118	18	10	5.9115	3.4223	2.7304
118.5	18	10	5.8934	3.3955	2.7203
119	18	10	5.8992	3.3903	2.7236
119.5	18	10	5.8367	3.388	2.6886
120	18	10	5.8098	3.3824	2.6735
120.5	18	10	5.7018	3.3643	2.613
121	18	10	5.6671	3.3661	2.5936
100	18.5	10	5.6662	3.3608	2.5931
100.5	18.5	10	5.6638	3.3632	2.5917
101	18.5	10	5.6535	3.3667	2.5859
101.5	18.5	10	5.675	3.3732	2.598
102	18.5	10	5.6796	3.3759	2.6006
102.5	18.5	10	5.6863	3.3806	2.6043
103	18.5	10	5.6668	3.3804	2.5934
103.5	18.5	10	5.6966	3.3948	2.6101
104	18.5	10	5.6952	3.4083	2.6093
104.5	18.5	10	5.6807	3.4203	2.6012
105	18.5	10	5.6987	3.4303	2.6113
105.5	18.5	10	5.7342	3.43	2.6312
106	18.5	10	5.7228	3.4171	2.6248
106.5	18.5	10	5.7072	3.3911	2.616
107	18.5	10	5.683	3.358	2.6025
107.5	18.5	10	5.6771	3.3356	2.5992
108	18.5	10	5.6866	3.3342	2.6045
108.5	18.5	10	5.6935	3.3596	2.6084
109	18.5	10	5.7217	3.3986	2.6241
109.5	18.5	10	5.7924	3.4337	2.6637
110	18.5	10	5.8219	3.4535	2.6803
110.5	18.5	10	5.8352	3.4516	2.6877
111	18.5	10	5.7949	3.4365	2.6651
111.5	18.5	10	5.7885	3.4184	2.6616
112	18.5	10	5.7665	3.411	2.6492
112.5	18.5	10	5.7773	3.4123	2.6553
113	18.5	10	5.8061	3.4175	2.6714
113.5	18.5	10	5.7865	3.4148	2.6604
114	18.5	10	5.8484	3.4247	2.6951
114.5	18.5	10	5.9032	3.4306	2.7258
115	18.5	10	5.9036	3.4284	2.726
115.5	18.5	10	5.9101	3.4304	2.7296
116	18.5	10	5.9085	3.4312	2.7287
116.5	18.5	10	5.8888	3.427	2.7177
117	18.5	10	5.9106	3.4255	2.7299
117.5	18.5	10	5.9062	3.4202	2.7275
118	18.5	10	5.8946	3.4063	2.721
118.5	18.5	10	5.8981	3.3913	2.7229
119	18.5	10	5.9248	3.3873	2.7379
119.5	18.5	10	5.9165	3.3921	2.7332
120	18.5	10	5.8642	3.3851	2.704
120.5	18.5	10	5.7115	3.3597	2.6185
121	18.5	10	5.6832	3.3682	2.6026
100	19	10	5.6478	3.3583	2.5828
100.5	19	10	5.6555	3.3614	2.5871
101	19	10	5.644	3.3632	2.5806
101.5	19	10	5.6651	3.368	2.5925
102	19	10	5.6618	3.371	2.5906
102.5	19	10	5.6497	3.3708	2.5838
103	19	10	5.6217	3.3673	2.5681
103.5	19	10	5.6539	3.3806	2.5862
104	19	10	5.6412	3.3884	2.5791
104.5	19	10	5.6921	3.4136	2.6076
105	19	10	5.7322	3.4301	2.63
105.5	19	10	5.7273	3.4217	2.6273
106	19	10	5.7201	3.4094	2.6233
106.5	19	10	5.7081	3.3921	2.6165
107	19	10	5.6935	3.3704	2.6083
107.5	19	10	5.6917	3.3566	2.6074
108	19	10	5.6689	3.3524	2.5946
108.5	19	10	5.7606	3.3841	2.6459
109	19	10	5.7706	3.423	2.6516
109.5	19	10	5.7783	3.4689	2.6559
110	19	10	5.8392	3.4998	2.69
110.5	19	10	5.9286	3.4743	2.74
111	19	10	5.8351	3.4511	2.6877
111.5	19	10	5.806	3.4285	2.6713
112	19	10	5.7609	3.4178	2.6461
112.5	19	10	5.7516	3.414	2.6409
113	19	10	5.7473	3.4125	2.6385
113.5	19	10	5.7644	3.4114	2.6481
114	19	10	5.7803	3.4122	2.657
114.5	19	10	5.7879	3.4087	2.6612
115	19	10	5.8167	3.4123	2.6774
115.5	19	10	5.8608	3.4231	2.7021
116	19	10	5.8599	3.4247	2.7015
116.5	19	10	5.8619	3.4217	2.7027
117	19	10	5.8925	3.4179	2.7198
117.5	19	10	5.8919	3.4076	2.7195
118	19	10	5.8821	3.3973	2.714
118.5	19	10	5.8751	3.3903	2.71
119	19	10	5.9075	3.3907	2.7282
119.5	19	10	5.9021	3.3948	2.7252
120	19	10	5.8626	3.3815	2.7031
120.5	19	10	5.8799	3.383	2.7127
121	19	10	5.7411	3.3707	2.635
100	19.5	10	5.6879	3.3622	2.6052
100.5	19.5	10	5.6478	3.3586	2.5827
101	19.5	10	5.6583	3.3611	2.5886
101.5	19.5	10	5.6415	3.3595	2.5792
102	19.5	10	5.6352	3.3607	2.5757
102.5	19.5	10	5.6609	3.3688	2.5901
103	19.5	10	5.6405	3.3673	2.5787
103.5	19.5	10	5.6715	3.3782	2.596
104	19.5	10	5.6551	3.3842	2.5869
104.5	19.5	10	5.6845	3.4046	2.6033
105	19.5	10	5.7296	3.4228	2.6286
105.5	19.5	10	5.7337	3.4191	2.6309
106	19.5	10	5.7266	3.4081	2.6269
106.5	19.5	10	5.7184	3.3966	2.6223
107	19.5	10	5.7104	3.3844	2.6178
107.5	19.5	10	5.6765	3.3653	2.5989
108	19.5	10	5.6621	3.3709	2.5908
108.5	19.5	10	5.7061	3.3944	2.6154
109	19.5	10	5.7056	3.4273	2.6151
109.5	19.5	10	5.7472	3.4325	2.6384
110	19.5	10	5.7765	3.4632	2.6549
110.5	19.5	10	5.895	3.479	2.7212
111	19.5	10	5.8499	3.4512	2.6959
111.5	19.5	10	5.7828	3.4335	2.6583
112	19.5	10	5.759	3.4158	2.6451
112.5	19.5	10	5.76	3.4187	2.6456
113	19.5	10	5.7382	3.412	2.6334
113.5	19.5	10	5.7446	3.4088	2.637
114	19.5	10	5.761	3.4086	2.6462
114.5	19.5	10	5.786	3.4106	2.6602
115	19.5	10	5.8162	3.4172	2.677
115.5	19.5	10	5.8426	3.424	2.6919
116	19.5	10	5.8039	3.4206	2.6702
116.5	19.5	10	5.8426	3.4236	2.6918
117	19.5	10	5.8695	3.421	2.7069
117.5	19.5	10	5.8703	3.4123	2.7073
118	19.5	10	5.8674	3.4046	2.7057
118.5	19.5	10	5.8635	3.3988	2.7036
119	19.5	10	5.8405	3.3921	2.6907
119.5	19.5	10	5.8711	3.3925	2.7078
120	19.5	10	5.9108	3.3906	2.73
120.5	19.5	10	5.8535	3.3758	2.698
121	19.5	10	5.8903	3.3887	2.7186
100	20	10	5.6705	3.3662	2.5955
100.5	20	10	5.6663	3.3621	2.5931
101	20	10	5.6465	3.357	2.5821
101.5	20	10	5.6373	3.3548	2.5769
102	20	10	5.6988	3.3591	2.6113
102.5	20	10	5.697	3.3644	2.6103
103	20	10	5.6579	3.3703	2.5884
103.5	20	10	5.65	3.3739	2.584
104	20	10	5.6645	3.3839	2.5921
104.5	20	10	5.6974	3.4044	2.6105
105	20	10	5.7124	3.4193	2.619
105.5	20	10	5.7491	3.4228	2.6395
106	20	10	5.7409	3.4129	2.6349
106.5	20	10	5.7347	3.4031	2.6314
107	20	10	5.6526	3.3906	2.5854
107.5	20	10	5.6612	3.3873	2.5903
108	20	10	5.5506	3.4083	2.5283
108.5	20	10	5.5945	3.3926	2.5529
109	20	10	5.6222	3.3563	2.5684
109.5	20	10	5.6518	3.3399	2.585
110	20	10	5.5845	3.3457	2.5473
110.5	20	10	5.7494	3.4507	2.6397
111	20	10	5.7551	3.4597	2.6429
111.5	20	10	5.7673	3.4374	2.6497
112	20	10	5.7474	3.426	2.6385
112.5	20	10	5.7669	3.4237	2.6495
113	20	10	5.7461	3.4156	2.6378
113.5	20	10	5.7176	3.4112	2.6219
114	20	10	5.7402	3.407	2.6345
114.5	20	10	5.7363	3.407	2.6323
115	20	10	5.7618	3.4177	2.6466
115.5	20	10	5.801	3.4285	2.6685
116	20	10	5.7892	3.4298	2.662
116.5	20	10	5.7788	3.4226	2.6561
117	20	10	5.8084	3.4193	2.6727
117.5	20	10	5.8294	3.415	2.6845
118	20	10	5.8614	3.4155	2.7024
118.5	20	10	5.8541	3.4096	2.6983
119	20	10	5.8535	3.4047	2.698
119.5	20	10	5.873	3.3958	2.7089
120	20	10	5.8917	3.388	2.7193
120.5	20	10	5.8635	3.3716	2.7035
121	20	10	5.7976	3.3642	2.6667
100	20.5	10	5.6737	3.3727	2.5972
100.5	20.5	10	5.6815	3.3667	2.6016
101	20.5	10	5.6803	3.362	2.601
101.5	20.5	10	5.6623	3.3587	2.5909
102	20.5	10	5.6402	3.3516	2.5785
102.5	20.5	10	5.6601	3.3584	2.5897
103	20.5	10	5.6528	3.3673	2.5856
103.5	20.5	10	5.6866	3.3829	2.6045
104	20.5	10	5.6934	3.3914	2.6083
104.5	20.5	10	5.7144	3.4064	2.62
105	20.5	10	5.7536	3.4235	2.642
105.5	20.5	10	5.7287	3.4245	2.6281
106	20.5	10	5.7252	3.4242	2.6261
106.5	20.5	10	5.687	3.4097	2.6047
107	20.5	10	5.6963	3.4174	2.6099
107.5	20.5	10	5.6645	3.4134	2.5921
108	20.5	10	5.5393	3.4081	2.522
108.5	20.5	10	5.5851	3.3555	2.5477
109	20.5	10	5.5793	3.301	2.5444
109.5	20.5	10	5.6504	3.3366	2.5842
110	20.5	10	5.5909	3.2862	2.5509
110.5	20.5	10	5.7044	3.4043	2.6144
111	20.5	10	5.755	3.4371	2.6428
111.5	20.5	10	5.7686	3.4402	2.6504
112	20.5	10	5.7786	3.4363	2.656
112.5	20.5	10	5.8069	3.416	2.6719
113	20.5	10	5.8196	3.3998	2.679
113.5	20.5	10	5.7206	3.4167	2.6235
114	20.5	10	5.7608	3.4136	2.646
114.5	20.5	10	5.7591	3.4186	2.6451
115	20.5	10	5.7639	3.4248	2.6478
115.5	20.5	10	5.7759	3.4327	2.6545
116	20.5	10	5.7784	3.4331	2.6559
116.5	20.5	10	5.761	3.4237	2.6462
117	20.5	10	5.7546	3.4148	2.6425
117.5	20.5	10	5.7995	3.4154	2.6677
118	20.5	10	5.8344	3.4196	2.6873
118.5	20.5	10	5.8534	3.4224	2.6979
119	20.5	10	5.86	3.4177	2.7016
119.5	20.5	10	5.8555	3.4014	2.6991
120	20.5	10	5.8902	3.3848	2.7185
120.5	20.5	10	5.8052	3.3547	2.6709
121	20.5	10	5.8334	3.3542	2.6867
100	21	10	5.6504	3.3935	2.5842
100.5	21	10	5.6799	3.3822	2.6008
101	21	10	5.6718	3.3751	2.5962
101.5	21	10	5.647	3.3568	2.5823
102	21	10	5.6295	3.3471	2.5725
102.5	21	10	5.648	3.3419	2.5829
103	21	10	5.6504	3.3551	2.5842
103.5	21	10	5.6314	3.3872	2.5736
104	21	10	5.6346	3.4	2.5754
104.5	21	10	5.6483	3.4151	2.583
105	21	10	5.6775	3.4292	2.5994
105.5	21	10	5.6825	3.4353	2.6022
106	21	10	5.6989	3.458	2.6114
106.5	21	10	5.6981	3.4635	2.6109
107	21	10	5.697	3.4613	2.6103
107.5	21	10	5.6219	3.4169	2.5682
108	21	10	5.5642	3.3731	2.5359
108.5	21	10	5.5789	3.3159	2.5442
109	21	10	5.5187	3.2951	2.5105
109.5	21	10	5.5905	3.324	2.5507
110	21	10	5.6409	3.3434	2.5789
110.5	21	10	5.6566	3.371	2.5877
111	21	10	5.7335	3.4048	2.6307
111.5	21	10	5.7628	3.4277	2.6472
112	21	10	5.7927	3.439	2.6639
112.5	21	10	5.8179	3.4258	2.678
113	21	10	5.7931	3.4094	2.6641
113.5	21	10	5.7727	3.4049	2.6527
114	21	10	5.7768	3.4001	2.655
114.5	21	10	5.7849	3.4413	2.6595
115	21	10	5.7853	3.4393	2.6598
115.5	21	10	5.7786	3.4376	2.656
116	21	10	5.7763	3.4329	2.6547
116.5	21	10	5.7669	3.4268	2.6495
117	21	10	5.7528	3.4168	2.6416
117.5	21	10	5.7462	3.4119	2.6378
118	21	10	5.7994	3.4206	2.6677
118.5	21	10	5.8647	3.4304	2.7042
119	21	10	5.865	3.424	2.7044
119.5	21	10	5.8708	3.4044	2.7077
120	21	10	5.8403	3.3728	2.6905
120.5	21	10	5.7324	3.3334	2.6301
121	21	10	5.8362	3.3443	2.6883
100	21.5	10	5.6515	3.4049	2.5848
100.5	21.5	10	5.6653	3.3715	2.5926
101	21.5	10	5.6713	3.3541	2.5959
101.5	21.5	10	5.7171	3.355	2.6216
102	21.5	10	5.5465	3.3268	2.526
102.5	21.5	10	5.5079	3.3268	2.5044
103	21.5	10	5.5444	3.356	2.5248
103.5	21.5	10	5.5988	3.3935	2.5553
104	21.5	10	5.636	3.4334	2.5762
104.5	21.5	10	5.6592	3.4496	2.5891
105	21.5	10	5.7038	3.4649	2.6141
105.5	21.5	10	5.7402	3.4864	2.6345
106	21.5	10	5.7937	3.5068	2.6645
106.5	21.5	10	5.7878	3.5054	2.6612
107	21.5	10	5.7354	3.4752	2.6319
107.5	21.5	10	5.6729	3.448	2.5968
108	21.5	10	5.6539	3.4069	2.5862
108.5	21.5	10	5.6251	3.3884	2.5701
109	21.5	10	5.6589	3.4151	2.589
109.5	21.5	10	5.754	3.4174	2.6423
110	21.5	10	5.8477	3.4489	2.6947
110.5	21.5	10	5.9123	3.4701	2.7309
111	21.5	10	5.8874	3.4981	2.717
111.5	21.5	10	5.9399	3.5049	2.7463
112	21.5	10	5.9036	3.5171	2.726
112.5	21.5	10	5.9577	3.4783	2.7563
113	21.5	10	5.8786	3.4539	2.712
113.5	21.5	10	5.8137	3.4524	2.6757
114	21.5	10	5.8027	3.4489	2.6695
114.5	21.5	10	5.8242	3.4408	2.6816
115	21.5	10	5.841	3.4326	2.691
115.5	21.5	10	5.8387	3.4333	2.6897
116	21.5	10	5.7851	3.4408	2.6596
116.5	21.5	10	5.7964	3.438	2.666
117	21.5	10	5.7799	3.4285	2.6567
117.5	21.5	10	5.7463	3.4208	2.6379
118	21.5	10	5.8216	3.4332	2.6801
118.5	21.5	10	5.8727	3.4358	2.7087
119	21.5	10	5.8507	3.4265	2.6964
119.5	21.5	10	5.8349	3.3982	2.6875
120	21.5	10	5.8046	3.3634	2.6706
120.5	21.5	10	5.6833	3.3249	2.6026
121	21.5	10	5.6819	3.32	2.6019
100	22	10	5.6694	3.3924	2.5949
100.5	22	10	5.7348	3.38	2.6315
101	22	10	5.6637	3.3255	2.5917
101.5	22	10	5.6027	3.3567	2.5575
102	22	10	5.5062	3.3329	2.5034
102.5	22	10	5.5194	3.2986	2.5109
103	22	10	5.5586	3.3224	2.5328
103.5	22	10	5.6639	3.3931	2.5918
104	22	10	5.7261	3.4434	2.6266
104.5	22	10	5.7562	3.4656	2.6435
105	22	10	5.8136	3.4931	2.6756
105.5	22	10	5.8425	3.5155	2.6918
106	22	10	5.8721	3.517	2.7084
106.5	22	10	5.8467	3.5106	2.6941
107	22	10	5.7418	3.4833	2.6354
107.5	22	10	5.7179	3.4853	2.622
108	22	10	5.7131	3.4989	2.6193
108.5	22	10	5.7375	3.5004	2.633
109	22	10	5.809	3.5056	2.6731
109.5	22	10	5.9201	3.5374	2.7353
110	22	10	6.0104	3.6099	2.783
110.5	22	10	5.9861	3.56	2.7722
111	22	10	5.9636	3.5447	2.7596
111.5	22	10	6.0206	3.5274	2.786
112	22	10	6.0958	3.5474	2.8078
112.5	22	10	6.0726	3.5278	2.801
113	22	10	6.028	3.5113	2.7881
113.5	22	10	5.968	3.5104	2.7621
114	22	10	5.902	3.501	2.7251
114.5	22	10	5.8722	3.4847	2.7085
115	22	10	5.8237	3.4778	2.6813
115.5	22	10	5.8574	3.4594	2.7002
116	22	10	5.8626	3.4424	2.703
116.5	22	10	5.8397	3.4271	2.6902
117	22	10	5.7834	3.4388	2.6587
117.5	22	10	5.7716	3.4322	2.6521
118	22	10	5.7349	3.4279	2.6316
118.5	22	10	5.7941	3.4306	2.6647
119	22	10	5.7614	3.4068	2.6464
119.5	22	10	5.7698	3.3866	2.6511
120	22	10	5.6894	3.3479	2.6061
120.5	22	10	5.6264	3.3223	2.5708
121	22	10	5.6917	3.3339	2.6073
100	22.5	10	5.7389	3.3718	2.6338
100.5	22.5	10	5.7256	3.3577	2.6263
101	22.5	10	5.635	3.2755	2.5756
101.5	22.5	10	5.5889	3.3308	2.5498
102	22.5	10	5.6203	3.3456	2.5674
102.5	22.5	10	5.6798	3.3447	2.6007
103	22.5	10	5.7374	3.4143	2.6329
103.5	22.5	10	5.7348	3.4875	2.6315
104	22.5	10	5.8093	3.5408	2.6732
104.5	22.5	10	5.8322	3.5178	2.686
105	22.5	10	5.866	3.5181	2.7049
105.5	22.5	10	5.8688	3.5245	2.7065
106	22.5	10	5.8826	3.5134	2.7143
106.5	22.5	10	5.8586	3.5086	2.7008
107	22.5	10	5.7783	3.4832	2.6559
107.5	22.5	10	5.8082	3.5133	2.6726
108	22.5	10	5.7975	3.5308	2.6666
108.5	22.5	10	5.8261	3.5122	2.6826
109	22.5	10	5.8531	3.5403	2.6977
109.5	22.5	10	5.9045	3.5686	2.7265
110	22.5	10	6.0088	3.5854	2.7825
110.5	22.5	10	6.0114	3.5558	2.7833
111	22.5	10	5.9689	3.55	2.7626
111.5	22.5	10	6.006	3.5777	2.7817
112	22.5	10	5.9614	3.5627	2.7584
112.5	22.5	10	6.004	3.559	2.7812
113	22.5	10	6.0358	3.5397	2.7904
113.5	22.5	10	6.0408	3.5444	2.7918
114	22.5	10	5.9652	3.5426	2.7605
114.5	22.5	10	5.91	3.5246	2.7296
115	22.5	10	5.9423	3.5181	2.7477
115.5	22.5	10	5.9101	3.5058	2.7296
116	22.5	10	5.8768	3.481	2.711
116.5	22.5	10	5.8478	3.4661	2.6948
117	22.5	10	5.8	3.4642	2.668
117.5	22.5	10	5.7544	3.4569	2.6425
118	22.5	10	5.7174	3.4431	2.6217
118.5	22.5	10	5.67	3.4114	2.5952
119	22.5	10	5.6252	3.3823	2.5701
119.5	22.5	10	5.5854	3.3711	2.5478
120	22.5	10	5.5942	3.3406	2.5528
120.5	22.5	10	5.5837	3.3315	2.5469
121	22.5	10	5.6596	3.3472	2.5894
100	23	10	5.8013	3.3651	2.6687
100.5	23	10	5.6642	3.338	2.592
101	23	10	5.5867	3.2835	2.5486
101.5	23	10	5.4986	3.3211	2.4992
102	23	10	5.6975	3.3707	2.6106
102.5	23	10	5.8088	3.4046	2.673
103	23	10	5.8343	3.437	2.6872
103.5	23	10	5.8097	3.4676	2.6734
104	23	10	5.8702	3.5036	2.7073
104.5	23	10	5.8362	3.5013	2.6883
105	23	10	5.8262	3.5079	2.6827
105.5	23	10	5.814	3.5126	2.6758
106	23	10	5.8243	3.5148	2.6816
106.5	23	10	5.8415	3.5154	2.6913
107	23	10	5.7857	3.4826	2.66
107.5	23	10	5.8333	3.5077	2.6867
108	23	10	5.8787	3.5156	2.7121
108.5	23	10	5.851	3.5197	2.6965
109	23	10	5.8782	3.5521	2.7118
109.5	23	10	5.9046	3.5685	2.7266
110	23	10	5.9692	3.5562	2.7628
110.5	23	10	6.0012	3.5808	2.7803
111	23	10	6.0507	3.576	2.7947
111.5	23	10	6.0149	3.5806	2.7843
112	23	10	6.0531	3.5741	2.7954
112.5	23	10	6.0884	3.5716	2.8056
113	23	10	6.086	3.5292	2.8049
113.5	23	10	6.0381	3.5498	2.791
114	23	10	6.0152	3.5649	2.7844
114.5	23	10	5.997	3.5311	2.7783
115	23	10	6.0119	3.5429	2.7835
115.5	23	10	5.9749	3.5488	2.7659
116	23	10	5.9311	3.5164	2.7414
116.5	23	10	5.9286	3.5065	2.74
117	23	10	5.8591	3.5086	2.7011
117.5	23	10	5.8123	3.5015	2.6749
118	23	10	5.7411	3.4726	2.635
118.5	23	10	5.6452	3.4207	2.5813
119	23	10	5.5764	3.3791	2.5428
119.5	23	10	5.5417	3.3581	2.5234
120	23	10	5.5563	3.3466	2.5315
120.5	23	10	5.5648	3.3418	2.5363
121	23	10	5.5763	3.3441	2.5427
100	23.5	10	5.7791	3.3938	2.6563
100.5	23.5	10	5.7151	3.3592	2.6205
101	23.5	10	5.5277	3.3221	2.5155
101.5	23.5	10	5.5943	3.3397	2.5528
102	23.5	10	5.8225	3.401	2.6806
102.5	23.5	10	5.6716	3.4125	2.5961
103	23.5	10	5.7334	3.423	2.6307
103.5	23.5	10	5.7414	3.4382	2.6352
104	23.5	10	5.7806	3.4574	2.6572
104.5	23.5	10	5.8247	3.4946	2.6818
105	23.5	10	5.8314	3.4943	2.6856
105.5	23.5	10	5.7675	3.5094	2.6498
106	23.5	10	5.8754	3.5147	2.7102
106.5	23.5	10	5.9338	3.5136	2.7429
107	23.5	10	5.8594	3.4943	2.7013
107.5	23.5	10	5.902	3.5426	2.7251
108	23.5	10	5.9172	3.5562	2.7336
108.5	23.5	10	5.8861	3.5506	2.7162
109	23.5	10	5.916	3.5616	2.733
109.5	23.5	10	5.93	3.5678	2.7408
110	23.5	10	5.9454	3.5693	2.7494
110.5	23.5	10	5.9961	3.5438	2.7778
[truncated: 16,060 more rows]
