# Supplementary material for: Seismological reference earth model in South China (SREM-SC): Crust and uppermost mantle
Source: Frontiers journal article supplement (doi:10.3389/feart.2022.1080307), 2023-01-30
Supplement: Table_3.XLSX [file Table_3.XLSX]

## Sheet: Sheet1
100	18	32.2517
100.5	18	31.0967
101	18	31.3706
101.5	18	31.7279
102	18	31.8034
102.5	18	31.7675
103	18	31.4178
103.5	18	31.227
104	18	31.0162
104.5	18	30.8029
105	18	30.4129
105.5	18	29.6936
106	18	29.2029
106.5	18	29.0031
107	18	29.0752
107.5	18	29.2215
108	18	29.5677
108.5	18	29.829
109	18	29.7497
109.5	18	29.231
110	18	28.6882
110.5	18	28.0985
111	18	27.7544
111.5	18	27.3182
112	18	27.3252
112.5	18	26.8264
113	18	27.4084
113.5	18	26.7979
114	18	26.6938
114.5	18	26.9901
115	18	26.7569
115.5	18	28.8598
116	18	28.783
116.5	18	29.5941
117	18	29.5931
117.5	18	28.4661
118	18	28.1072
118.5	18	29.3017
119	18	28.831
119.5	18	27.7126
120	18	27.3175
120.5	18	28.7837
121	18	28.1439
100	18.5	32.2969
100.5	18.5	30.9204
101	18.5	31.1936
101.5	18.5	31.6061
102	18.5	31.9792
102.5	18.5	32.0218
103	18.5	31.7072
103.5	18.5	31.5187
104	18.5	31.3389
104.5	18.5	30.9883
105	18.5	30.4086
105.5	18.5	29.4094
106	18.5	28.7234
106.5	18.5	28.5618
107	18.5	28.7501
107.5	18.5	28.9788
108	18.5	29.3738
108.5	18.5	30.0211
109	18.5	30.2212
109.5	18.5	29.5932
110	18.5	28.92
110.5	18.5	28.3706
111	18.5	27.593
111.5	18.5	26.9075
112	18.5	26.7696
112.5	18.5	26.5832
113	18.5	26.6493
113.5	18.5	26.2315
114	18.5	26.3912
114.5	18.5	26.7141
115	18.5	26.6178
115.5	18.5	29.5651
116	18.5	28.6924
116.5	18.5	30.0481
117	18.5	30.2232
117.5	18.5	29.6148
118	18.5	28.792
118.5	18.5	29.916
119	18.5	29.6251
119.5	18.5	28.5063
120	18.5	28.0312
120.5	18.5	28.9137
121	18.5	28.122
100	19	32.2726
100.5	19	31.3881
101	19	31.0459
101.5	19	31.8117
102	19	32.1803
102.5	19	32.062
103	19	31.8875
103.5	19	31.7496
104	19	31.569
104.5	19	31.2669
105	19	30.571
105.5	19	28.9714
106	19	28.1055
106.5	19	28.1031
107	19	28.3164
107.5	19	28.6581
108	19	28.9879
108.5	19	29.1873
109	19	29.9531
109.5	19	30.8172
110	19	31.9081
110.5	19	28.4115
111	19	27.1555
111.5	19	26.5563
112	19	26.4467
112.5	19	26.2828
113	19	26.4155
113.5	19	26.6315
114	19	26.1915
114.5	19	26.4794
115	19	26.5865
115.5	19	26.6652
116	19	28.8318
116.5	19	29.8292
117	19	29.6059
117.5	19	29.7001
118	19	29.2915
118.5	19	30.6281
119	19	30.4499
119.5	19	29.2528
120	19	28.569
120.5	19	28.7279
121	19	28.3857
100	19.5	32.4326
100.5	19.5	31.8063
101	19.5	31.4747
101.5	19.5	31.6974
102	19.5	32.3965
102.5	19.5	32.2782
103	19.5	32.0997
103.5	19.5	32.009
104	19.5	31.7629
104.5	19.5	31.2415
105	19.5	30.0587
105.5	19.5	28.1859
106	19.5	27.2784
106.5	19.5	27.7287
107	19.5	28.1327
107.5	19.5	28.5119
108	19.5	28.694
108.5	19.5	28.8346
109	19.5	29.4334
109.5	19.5	29.5345
110	19.5	28.6514
110.5	19.5	27.3758
111	19.5	26.5131
111.5	19.5	26.1781
112	19.5	26.1811
112.5	19.5	26.1914
113	19.5	26.2817
113.5	19.5	25.9671
114	19.5	25.8324
114.5	19.5	25.927
115	19.5	26.1004
115.5	19.5	26.5055
116	19.5	29.5381
116.5	19.5	29.2545
117	19.5	29.2184
117.5	19.5	30.5525
118	19.5	29.5533
118.5	19.5	31.0104
119	19.5	30.9921
119.5	19.5	30.7341
120	19.5	29.3523
120.5	19.5	29.21
121	19.5	28.5027
100	20	33.1964
100.5	20	32.5722
101	20	32.2926
101.5	20	32.3582
102	20	32.6419
102.5	20	32.5661
103	20	32.4164
103.5	20	32.278
104	20	32.0368
104.5	20	31.495
105	20	30.1865
105.5	20	28.1854
106	20	27.3235
106.5	20	27.9679
107	20	28.3337
107.5	20	28.504
108	20	28.5444
108.5	20	28.6174
109	20	28.6717
109.5	20	28.006
110	20	25.5345
110.5	20	25.3113
111	20	25.5797
111.5	20	25.8557
112	20	25.9339
112.5	20	25.931
113	20	25.9186
113.5	20	26.1412
114	20	26.1473
114.5	20	26.3468
115	20	26.5814
115.5	20	26.8176
116	20	27.0081
116.5	20	29.0413
117	20	30.203
117.5	20	31.0225
118	20	31.5346
118.5	20	31.967
119	20	32.1341
119.5	20	31.9041
120	20	30.7953
120.5	20	30.0096
121	20	28.9266
100	20.5	33.1746
100.5	20.5	32.63
101	20.5	32.5464
101.5	20.5	32.5791
102	20.5	32.8086
102.5	20.5	32.7862
103	20.5	32.6181
103.5	20.5	32.4029
104	20.5	32.3591
104.5	20.5	32.3082
105	20.5	31.3615
105.5	20.5	29.8919
106	20.5	29.1058
106.5	20.5	28.894
107	20.5	28.8267
107.5	20.5	28.6587
108	20.5	28.5251
108.5	20.5	28.44
109	20.5	28.3681
109.5	20.5	28.1238
110	20.5	28.2327
110.5	20.5	26.3286
111	20.5	25.9721
111.5	20.5	26.0589
112	20.5	26.0373
112.5	20.5	25.9633
113	20.5	25.941
113.5	20.5	26.1566
114	20.5	26.2223
114.5	20.5	26.4304
115	20.5	26.9315
115.5	20.5	27.0074
116	20.5	27.1203
116.5	20.5	30.0381
117	20.5	29.7905
117.5	20.5	31.2522
118	20.5	32.0677
118.5	20.5	32.1122
119	20.5	33.1643
119.5	20.5	33.1293
120	20.5	32.0279
120.5	20.5	31.0405
121	20.5	29.2988
100	21	32.5111
100.5	21	32.2248
101	21	32.6661
101.5	21	32.8438
102	21	32.9072
102.5	21	32.8853
103	21	32.812
103.5	21	32.2731
104	21	32.4531
104.5	21	33.1386
105	21	31.8845
105.5	21	30.2984
106	21	29.1424
106.5	21	29.4625
107	21	29.2464
107.5	21	28.8204
108	21	28.5186
108.5	21	28.3402
109	21	28.1984
109.5	21	28.0463
110	21	27.6977
110.5	21	26.7982
111	21	26.6788
111.5	21	26.8068
112	21	26.5334
112.5	21	26.1336
113	21	26.0374
113.5	21	26.2098
114	21	26.3433
114.5	21	26.5509
115	21	26.8504
115.5	21	26.9907
116	21	27.1227
116.5	21	27.2261
117	21	30.4485
117.5	21	29.7415
118	21	32.1612
118.5	21	32.7379
119	21	34.0438
119.5	21	34.4082
120	21	33.8951
120.5	21	32.1833
121	21	29.6178
100	21.5	32.7193
100.5	21.5	32.2514
101	21.5	32.561
101.5	21.5	33.0805
102	21.5	32.8401
102.5	21.5	32.701
103	21.5	32.7714
103.5	21.5	31.7381
104	21.5	32.7287
104.5	21.5	33.9292
105	21.5	30.6432
105.5	21.5	29.6427
106	21.5	29.9434
106.5	21.5	30.0719
107	21.5	29.4105
107.5	21.5	28.6643
108	21.5	28.5095
108.5	21.5	28.4278
109	21.5	28.1254
109.5	21.5	27.848
110	21.5	27.3868
110.5	21.5	26.7579
111	21.5	27.4076
111.5	21.5	28.0348
112	21.5	27.6417
112.5	21.5	26.5798
113	21.5	26.2953
113.5	21.5	26.5617
114	21.5	26.8204
114.5	21.5	27.1437
115	21.5	27.2637
115.5	21.5	27.343
116	21.5	27.4112
116.5	21.5	27.5247
117	21.5	27.3558
117.5	21.5	29.7875
118	21.5	31.8729
118.5	21.5	33.3981
119	21.5	34.9313
119.5	21.5	35.8545
120	21.5	35.8704
120.5	21.5	34.1095
121	21.5	29.9838
100	22	33.1778
100.5	22	32.4139
101	22	32.5038
101.5	22	32.7407
102	22	32.5477
102.5	22	32.3573
103	22	31.7676
103.5	22	32.7312
104	22	34.0047
104.5	22	33.4553
105	22	31.4483
105.5	22	30.813
106	22	31.1915
106.5	22	30.798
107	22	30.0223
107.5	22	29.0978
108	22	28.7087
108.5	22	28.8945
109	22	28.6306
109.5	22	28.2727
110	22	28.0937
110.5	22	27.98
111	22	28.016
111.5	22	29.2477
112	22	30.0437
112.5	22	27.9839
113	22	27.0174
113.5	22	27.0689
114	22	27.4959
114.5	22	27.6164
115	22	27.7296
115.5	22	27.7839
116	22	27.9973
116.5	22	28.2955
117	22	28.4664
117.5	22	29.8285
118	22	32.3117
118.5	22	33.4955
119	22	35.3506
119.5	22	36.6699
120	22	37.7799
120.5	22	36.7645
121	22	29.8168
100	22.5	33.8871
100.5	22.5	33.8514
101	22.5	33.3329
101.5	22.5	33.3142
102	22.5	32.5135
102.5	22.5	32.8603
103	22.5	34.204
103.5	22.5	35.359
104	22.5	35.474
104.5	22.5	33.86
105	22.5	32.4139
105.5	22.5	32.0895
106	22.5	32.2187
106.5	22.5	31.6587
107	22.5	30.7831
107.5	22.5	29.8421
108	22.5	28.5337
108.5	22.5	28.7053
109	22.5	28.9135
109.5	22.5	28.767
110	22.5	28.9585
110.5	22.5	29.3217
111	22.5	29.7981
111.5	22.5	29.9141
112	22.5	29.9841
112.5	22.5	28.39
113	22.5	27.3118
113.5	22.5	27.1923
114	22.5	28.9756
114.5	22.5	28.6966
115	22.5	28.2722
115.5	22.5	28.1836
116	22.5	28.5951
116.5	22.5	28.7834
117	22.5	29.0369
117.5	22.5	29.5406
118	22.5	29.851
118.5	22.5	33.3066
119	22.5	35.0987
119.5	22.5	37.0422
120	22.5	37.8158
120.5	22.5	35.941
121	22.5	24.2694
100	23	34.8251
100.5	23	34.8433
101	23	35.1865
101.5	23	35.5346
102	23	32.7919
102.5	23	34.066
103	23	36.5266
103.5	23	37.131
104	23	36.4972
104.5	23	34.4278
105	23	32.982
105.5	23	33.2617
106	23	32.9121
106.5	23	31.8832
107	23	30.8651
107.5	23	29.7979
108	23	28.2422
108.5	23	28.2861
109	23	28.8538
109.5	23	28.6526
110	23	29.0232
110.5	23	29.4473
111	23	29.679
111.5	23	29.7169
112	23	29.2172
112.5	23	27.7851
113	23	27.0065
113.5	23	27.2539
114	23	28.8342
114.5	23	29.203
115	23	29.1182
115.5	23	29.1543
116	23	29.4286
116.5	23	29.0183
117	23	28.8532
117.5	23	29.1913
118	23	30.393
118.5	23	32.2558
119	23	34.3186
119.5	23	36.6957
120	23	37.4776
120.5	23	37.7385
121	23	18.5492
100	23.5	35.4148
100.5	23.5	37.4878
101	23.5	37.3708
101.5	23.5	37.4958
102	23.5	36.3948
102.5	23.5	38.0609
103	23.5	38.6626
103.5	23.5	38.1011
104	23.5	37.9015
104.5	23.5	36.5554
105	23.5	35.0593
105.5	23.5	35.0485
106	23.5	33.4337
106.5	23.5	31.5493
107	23.5	30.7587
107.5	23.5	30.3458
108	23.5	29.6958
108.5	23.5	29.8323
109	23.5	29.7377
109.5	23.5	29.2992
110	23.5	29.234
110.5	23.5	29.3595
111	23.5	29.5693
111.5	23.5	29.7133
112	23.5	29.441
112.5	23.5	28.3296
113	23.5	27.1694
113.5	23.5	28.6932
114	23.5	30.2075
114.5	23.5	29.8294
115	23.5	30.3627
115.5	23.5	30.6149
116	23.5	30.1725
116.5	23.5	29.0809
117	23.5	27.9976
117.5	23.5	27.9233
118	23.5	29.2458
118.5	23.5	31.1076
119	23.5	33.3027
119.5	23.5	35.8074
120	23.5	38.4756
120.5	23.5	40.1657
121	23.5	34.9944
100	24	36.7423
100.5	24	40.863
101	24	41.6329
101.5	24	42.4817
102	24	42.3509
102.5	24	41.892
103	24	40.0765
103.5	24	39.4043
104	24	38.8377
104.5	24	37.6177
105	24	36.2934
105.5	24	35.2589
106	24	33.4647
106.5	24	31.2398
107	24	31.0404
107.5	24	31.455
108	24	31.0191
108.5	24	31.4741
109	24	30.8318
109.5	24	30.1575
110	24	29.9252
110.5	24	30.0269
111	24	30.3931
111.5	24	30.5175
112	24	30.5538
112.5	24	30.023
113	24	29.1031
113.5	24	29.6628
114	24	30.6358
114.5	24	30.7092
115	24	30.426
115.5	24	30.1897
116	24	30.0227
116.5	24	29.4313
117	24	28.9701
117.5	24	28.6465
118	24	29.0517
118.5	24	29.993
119	24	31.5802
119.5	24	33.8799
120	24	36.8145
120.5	24	41.5717
121	24	46.5187
100	24.5	37.2092
100.5	24.5	42.0371
101	24.5	44.4719
101.5	24.5	45.2096
102	24.5	42.7321
102.5	24.5	42.4502
103	24.5	41.9321
103.5	24.5	41.2333
104	24.5	40.286
104.5	24.5	38.3631
105	24.5	36.7297
105.5	24.5	35.1788
106	24.5	33.6938
106.5	24.5	32.5124
107	24.5	32.0698
107.5	24.5	31.9315
108	24.5	31.6371
108.5	24.5	31.7117
109	24.5	31.2995
109.5	24.5	30.8119
110	24.5	30.7255
110.5	24.5	30.8916
111	24.5	31.2464
111.5	24.5	31.3078
112	24.5	31.5057
112.5	24.5	31.2079
113	24.5	30.1323
113.5	24.5	29.6985
114	24.5	30.282
114.5	24.5	30.9694
115	24.5	30.2621
115.5	24.5	30.3794
116	24.5	30.358
116.5	24.5	30.755
117	24.5	30.7622
117.5	24.5	30.1145
118	24.5	29.4837
118.5	24.5	28.8424
119	24.5	29.4063
119.5	24.5	31.206
120	24.5	32.5202
120.5	24.5	31.8326
121	24.5	35.9053
100	25	40.3111
100.5	25	43.827
101	25	47.4306
101.5	25	47.52
102	25	43.4941
102.5	25	43.5262
103	25	44.7177
103.5	25	44.6821
104	25	42.4132
104.5	25	39.0658
105	25	37.1243
105.5	25	35.166
106	25	34.1217
106.5	25	33.6932
107	25	33.3801
107.5	25	33.0154
108	25	32.6577
108.5	25	32.6304
109	25	32.1577
109.5	25	31.6687
110	25	31.7114
110.5	25	31.7106
111	25	32.0932
111.5	25	32.1769
112	25	32.0803
112.5	25	31.5592
113	25	30.1586
113.5	25	29.1288
114	25	29.4775
114.5	25	29.7233
115	25	30.0171
115.5	25	31.2283
116	25	31.3107
116.5	25	31.6992
117	25	31.9124
117.5	25	32.1971
118	25	31.1564
118.5	25	29.2508
119	25	28.3818
119.5	25	29.2953
120	25	29.7982
120.5	25	29.1788
121	25	28.1964
100	25.5	42.3827
100.5	25.5	44.9224
101	25.5	49.1552
101.5	25.5	48.3711
102	25.5	43.542
102.5	25.5	43.035
103	25.5	45.4476
103.5	25.5	46.5975
104	25.5	44.507
104.5	25.5	39.9777
105	25.5	37.1515
105.5	25.5	35.4516
106	25.5	34.7557
106.5	25.5	34.9428
107	25.5	34.9699
107.5	25.5	34.6187
108	25.5	34.3294
108.5	25.5	34.403
109	25.5	34.3364
109.5	25.5	33.9117
110	25.5	33.3567
110.5	25.5	32.9759
111	25.5	33.2961
111.5	25.5	32.9677
112	25.5	32.1434
112.5	25.5	31.0314
113	25.5	29.8307
113.5	25.5	29.3111
114	25.5	29.3723
114.5	25.5	29.2587
115	25.5	29.0678
115.5	25.5	30.4862
116	25.5	31.3583
116.5	25.5	32.0854
117	25.5	31.0557
117.5	25.5	31.8311
118	25.5	31.7775
118.5	25.5	31.2321
119	25.5	29.729
119.5	25.5	29.2406
120	25.5	29.3143
120.5	25.5	27.8464
121	25.5	24.4543
100	26	45.6764
100.5	26	48.0912
101	26	50.9465
101.5	26	48.9931
102	26	43.1301
102.5	26	42.789
103	26	45.604
103.5	26	46.9748
104	26	46.9682
104.5	26	43.2279
105	26	39.7
105.5	26	37.2508
106	26	35.7455
106.5	26	36.2956
107	26	36.6895
107.5	26	36.3451
108	26	36.0744
108.5	26	36.2727
109	26	36.8572
109.5	26	36.2015
110	26	34.9798
110.5	26	34.4047
111	26	34.5294
111.5	26	33.611
112	26	32.2563
112.5	26	30.7864
113	26	29.5998
113.5	26	29.6096
114	26	29.9284
114.5	26	29.7511
115	26	31.2994
115.5	26	29.4729
116	26	32.0217
116.5	26	32.0153
117	26	31.9958
117.5	26	32.2591
118	26	32.1675
118.5	26	32.1174
119	26	32.3054
119.5	26	31.16
120	26	30.9256
120.5	26	28.259
121	26	25.1233
100	26.5	48.1568
100.5	26.5	52.8626
101	26.5	54.5395
101.5	26.5	50.4377
102	26.5	41.1231
102.5	26.5	44.6949
103	26.5	47.1565
103.5	26.5	47.0401
104	26.5	46.7257
104.5	26.5	45.3028
105	26.5	42.5988
105.5	26.5	39.3231
106	26.5	38.1511
106.5	26.5	38.6651
107	26.5	38.573
107.5	26.5	37.8271
108	26.5	37.3388
108.5	26.5	37.2937
109	26.5	37.4864
109.5	26.5	36.6363
110	26.5	35.2625
110.5	26.5	34.6286
111	26.5	34.7609
111.5	26.5	34.356
112	26.5	32.6504
112.5	26.5	30.5726
113	26.5	29.7483
113.5	26.5	30.1112
114	26.5	30.8216
114.5	26.5	30.3596
115	26.5	30.7164
115.5	26.5	30.9298
116	26.5	31.6918
116.5	26.5	32.2772
117	26.5	32.3018
117.5	26.5	32.0899
118	26.5	31.6385
118.5	26.5	31.6095
119	26.5	32.2866
119.5	26.5	31.7455
120	26.5	31.1348
120.5	26.5	29.1303
121	26.5	27.0981
100	27	50.3562
100.5	27	55.0435
101	27	54.938
101.5	27	50.8351
102	27	46.5134
102.5	27	50.9075
103	27	48.1621
103.5	27	46.5585
104	27	45.1544
104.5	27	43.6414
105	27	42.9914
105.5	27	42.7872
106	27	40.9486
106.5	27	40.1789
107	27	39.5563
107.5	27	38.7932
108	27	37.9682
108.5	27	37.3393
109	27	36.7069
109.5	27	35.7262
110	27	34.2972
110.5	27	33.36
111	27	34.8471
111.5	27	35.9804
112	27	33.18
112.5	27	30.4231
113	27	30.1748
113.5	27	31.6641
114	27	31.5231
114.5	27	30.3905
115	27	29.196
115.5	27	30.0285
116	27	31.1147
116.5	27	32.0922
117	27	32.2465
117.5	27	31.852
118	27	31.6836
118.5	27	31.9126
119	27	32.3446
119.5	27	32.1816
120	27	31.5176
120.5	27	29.8522
121	27	28.4278
100	27.5	53.5708
100.5	27.5	55.7841
101	27.5	54.8591
101.5	27.5	50.9118
102	27.5	45.8841
102.5	27.5	48.4981
103	27.5	48.3406
103.5	27.5	46.0216
104	27.5	44.2285
104.5	27.5	41.6013
105	27.5	40.3228
105.5	27.5	43.3257
106	27.5	41.8954
106.5	27.5	40.8647
107	27.5	40.166
107.5	27.5	39.4014
108	27.5	38.3092
108.5	27.5	37.2449
109	27.5	36.1913
109.5	27.5	35.1389
110	27.5	33.195
110.5	27.5	30.9848
111	27.5	32.1047
111.5	27.5	35.885
112	27.5	32.8842
112.5	27.5	30.8318
113	27.5	30.5772
113.5	27.5	31.3178
114	27.5	31.5742
114.5	27.5	30.9132
115	27.5	29.845
115.5	27.5	29.6692
116	27.5	30.39
116.5	27.5	32.3915
117	27.5	32.185
117.5	27.5	31.766
118	27.5	32.1217
118.5	27.5	32.6455
119	27.5	33.6527
119.5	27.5	32.9544
120	27.5	31.9336
120.5	27.5	30.6643
121	27.5	29.6214
100	28	55.5328
100.5	28	56.7453
101	28	56.0257
101.5	28	53.509
102	28	49.0682
102.5	28	51.3099
103	28	49.6326
103.5	28	48.3799
104	28	45.376
104.5	28	43.3222
105	28	41.2552
105.5	28	41.3677
106	28	41.3207
106.5	28	41.0437
107	28	40.8105
107.5	28	40.3247
108	28	38.9953
108.5	28	37.3157
109	28	35.9106
109.5	28	35.3604
110	28	33.5496
110.5	28	31.2948
111	28	31.9802
111.5	28	33.0898
112	28	31.7998
112.5	28	30.412
113	28	30.5797
113.5	28	31.6003
114	28	31.9592
114.5	28	31.573
115	28	30.5903
115.5	28	29.9959
116	28	29.8285
116.5	28	31.111
117	28	31.4969
117.5	28	31.6735
118	28	32.2652
118.5	28	33.21
119	28	34.0284
119.5	28	33.6414
120	28	32.6326
120.5	28	31.5974
121	28	30.8334
100	28.5	56.8177
100.5	28.5	57.8272
101	28.5	57.5843
101.5	28.5	57.2429
102	28.5	58.8849
102.5	28.5	55.3913
103	28.5	50.8919
103.5	28.5	49.1928
104	28.5	45.3837
104.5	28.5	42.4413
105	28.5	40.357
105.5	28.5	40.0396
106	28.5	40.5164
106.5	28.5	41.0663
107	28.5	41.5048
107.5	28.5	41.7017
108	28.5	41.1737
108.5	28.5	38.2027
109	28.5	36.4156
109.5	28.5	34.6113
110	28.5	34.345
110.5	28.5	33.1274
111	28.5	32.7197
111.5	28.5	32.4794
112	28.5	31.5183
112.5	28.5	30.8816
113	28.5	31.9261
113.5	28.5	32.6959
114	28.5	32.6952
114.5	28.5	32.1158
115	28.5	31.3001
115.5	28.5	30.2768
116	28.5	29.6611
116.5	28.5	30.0211
117	28.5	30.6957
117.5	28.5	31.4704
118	28.5	32.1424
118.5	28.5	33.657
119	28.5	33.8958
119.5	28.5	33.7364
120	28.5	33.0898
120.5	28.5	32.2546
121	28.5	31.8901
100	29	56.9999
100.5	29	57.9809
101	29	58.1828
101.5	29	58.0472
102	29	56.0214
102.5	29	52.0061
103	29	48.7475
103.5	29	44.7502
104	29	41.9748
104.5	29	40.9712
105	29	39.8473
105.5	29	39.2087
106	29	40.0642
106.5	29	41.0079
107	29	41.8253
107.5	29	43.0697
108	29	42.4879
108.5	29	41.3189
109	29	38.0721
109.5	29	36.7586
110	29	35.7751
110.5	29	34.7864
111	29	33.9386
111.5	29	33.2514
112	29	32.3023
112.5	29	31.569
113	29	32.7791
113.5	29	33.7543
114	29	33.9653
114.5	29	33.0053
115	29	32.5504
115.5	29	31.631
116	29	30.2314
116.5	29	29.8496
117	29	30.5719
117.5	29	31.7446
118	29	33.3456
118.5	29	33.8922
119	29	33.6867
119.5	29	33.4669
120	29	32.7374
120.5	29	32.019
121	29	31.9902
100	29.5	57.0586
100.5	29.5	57.1049
101	29.5	58.65
101.5	29.5	58.8579
102	29.5	56.7074
102.5	29.5	52.1166
103	29.5	48.7714
103.5	29.5	44.1033
104	29.5	37.9566
104.5	29.5	41.7849
105	29.5	41.2826
105.5	29.5	40.4436
106	29.5	40.5
106.5	29.5	41.1484
107	29.5	40.7522
107.5	29.5	41.4227
108	29.5	43.0417
108.5	29.5	42.5698
109	29.5	41.6904
109.5	29.5	39.3894
110	29.5	37.5449
110.5	29.5	36.3795
111	29.5	35.1077
111.5	29.5	34.7788
112	29.5	33.9346
112.5	29.5	31.3818
113	29.5	31.9067
113.5	29.5	34.3664
114	29.5	35.7576
114.5	29.5	35.6557
115	29.5	34.1706
115.5	29.5	33.1807
116	29.5	32.9419
116.5	29.5	31.5314
117	29.5	31.285
117.5	29.5	32.0817
118	29.5	32.9472
118.5	29.5	33.1013
119	29.5	34.0904
119.5	29.5	33.6449
120	29.5	32.1744
120.5	29.5	31.1794
121	29.5	31.4759
100	30	58.1664
100.5	30	57.8094
101	30	60.2433
101.5	30	59.2238
102	30	62.5724
102.5	30	54.7241
103	30	49.168
103.5	30	42.8496
104	30	38.5478
104.5	30	43.0925
105	30	43.7131
105.5	30	40.4908
106	30	41.8259
106.5	30	41.8871
107	30	41.5548
107.5	30	43.0717
108	30	43.3936
108.5	30	42.0757
109	30	42.4063
109.5	30	41.7151
110	30	39.4369
110.5	30	37.7633
111	30	35.4762
111.5	30	36.7554
112	30	37.3506
112.5	30	33.5509
113	30	32.8616
113.5	30	34.6783
114	30	35.9415
114.5	30	35.2823
115	30	34.0778
115.5	30	32.9943
116	30	34.3125
116.5	30	33.0633
117	30	31.4229
117.5	30	31.7784
118	30	33.0102
118.5	30	33.8155
119	30	34.8509
119.5	30	33.6087
120	30	32.005
120.5	30	30.2892
121	30	30.51
100	30.5	59.0106
100.5	30.5	58.4476
101	30.5	58.5361
101.5	30.5	59.3942
102	30.5	61.0094
102.5	30.5	56.9939
103	30.5	49.1642
103.5	30.5	43.2331
104	30.5	40.9259
104.5	30.5	44.2802
105	30.5	44.2683
105.5	30.5	41.7125
106	30.5	41.9937
106.5	30.5	42.5246
107	30.5	43.748
107.5	30.5	46.2825
108	30.5	45.4845
108.5	30.5	44.3368
109	30.5	44.0997
109.5	30.5	42.6562
110	30.5	42.5331
110.5	30.5	40.6272
111	30.5	37.7799
111.5	30.5	37.766
112	30.5	37.7477
112.5	30.5	35.0055
113	30.5	33.8653
113.5	30.5	34.1724
114	30.5	34.2578
114.5	30.5	33.2343
115	30.5	31.9005
115.5	30.5	33.8303
116	30.5	38.1309
116.5	30.5	34.1894
117	30.5	30.5106
117.5	30.5	31.0736
118	30.5	32.4582
118.5	30.5	33.0941
119	30.5	33.4776
119.5	30.5	32.5186
120	30.5	31.4513
120.5	30.5	30.7431
121	30.5	30.766
100	31	59.7469
100.5	31	58.658
101	31	57.183
101.5	31	57.8828
102	31	58.9862
102.5	31	59.1238
103	31	50.3073
103.5	31	40.1998
104	31	43.1701
104.5	31	39.8475
105	31	40.3748
105.5	31	39.6351
106	31	41.6114
106.5	31	42.9391
107	31	44.906
107.5	31	46.4511
108	31	46.8992
108.5	31	46.3869
109	31	47.8342
109.5	31	45.8318
110	31	47.2317
110.5	31	43.8239
111	31	40.5756
111.5	31	37.09
112	31	35.3534
112.5	31	34.318
113	31	33.8567
113.5	31	33.7668
114	31	33.9186
114.5	31	33.0979
115	31	32.7263
115.5	31	38.3093
116	31	38.9301
116.5	31	35.2745
117	31	31.8413
117.5	31	30.5321
118	31	31.6944
118.5	31	31.5661
119	31	30.6966
119.5	31	30.2197
120	31	30.9903
120.5	31	31.5044
121	31	31.1305
100	31.5	60.8378
100.5	31.5	59.2859
101	31.5	57.7092
101.5	31.5	57.1205
102	31.5	57.3091
102.5	31.5	56.3528
103	31.5	56.4864
103.5	31.5	52.1185
104	31.5	43.3357
104.5	31.5	40.7574
105	31.5	39.3277
105.5	31.5	38.7046
106	31.5	39.6939
106.5	31.5	43.3733
107	31.5	45.8695
107.5	31.5	47.0039
108	31.5	47.9251
108.5	31.5	48.9063
109	31.5	49.0198
109.5	31.5	47.3594
110	31.5	45.0592
110.5	31.5	42.6978
111	31.5	39.7972
111.5	31.5	35.3043
112	31.5	33.7799
112.5	31.5	33.5812
113	31.5	34.0229
113.5	31.5	34.6745
114	31.5	34.4603
114.5	31.5	33.4628
115	31.5	33.4486
115.5	31.5	36.5288
116	31.5	36.1877
116.5	31.5	34.6306
117	31.5	32.1814
117.5	31.5	31.8583
118	31.5	31.229
118.5	31.5	30.848
119	31.5	28.9918
119.5	31.5	31.9319
120	31.5	32.1417
120.5	31.5	32.2179
121	31.5	30.9075
100	32	60.9682
100.5	32	59.7279
101	32	57.839
101.5	32	56.09
102	32	54.9047
102.5	32	51.3851
103	32	52.9667
103.5	32	47.6521
104	32	45.2915
104.5	32	44.7929
105	32	42.1979
105.5	32	41.1876
106	32	41.528
106.5	32	44.5767
107	32	46.5772
107.5	32	47.2207
108	32	47.7884
108.5	32	48.278
109	32	48.5925
109.5	32	47.7321
110	32	42.8105
110.5	32	38.2995
111	32	36.5218
111.5	32	34.6528
112	32	33.2478
112.5	32	32.9747
113	32	33.3495
113.5	32	33.6484
114	32	33.0392
114.5	32	32.642
115	32	32.6013
115.5	32	32.1907
116	32	31.1095
116.5	32	33.1023
117	32	32.1945
117.5	32	32.9101
118	32	32.8631
118.5	32	30.9263
119	32	30.7099
119.5	32	32.3288
120	32	31.0545
120.5	32	31.3662
121	32	31.1355
100	32.5	61.2413
100.5	32.5	60.1954
101	32.5	57.9913
101.5	32.5	54.8674
102	32.5	52.7272
102.5	32.5	52.2915
103	32.5	50.344
103.5	32.5	50.7138
104	32.5	51.0708
104.5	32.5	52.6806
105	32.5	46.1255
105.5	32.5	43.2277
106	32.5	44.5684
106.5	32.5	45.9678
107	32.5	46.7353
107.5	32.5	46.7437
108	32.5	46.8078
108.5	32.5	47.0022
109	32.5	47.1044
109.5	32.5	46.9214
110	32.5	41.9181
110.5	32.5	37.0443
111	32.5	35.7808
111.5	32.5	34.1889
112	32.5	32.8493
112.5	32.5	32.1492
113	32.5	32.0511
113.5	32.5	31.9803
114	32.5	31.7191
114.5	32.5	31.5378
115	32.5	31.2787
115.5	32.5	30.7072
116	32.5	30.7045
116.5	32.5	32.2225
117	32.5	33.1774
117.5	32.5	33.7855
118	32.5	31.6541
118.5	32.5	29.8066
119	32.5	28.8608
119.5	32.5	30.4573
120	32.5	30.5974
120.5	32.5	30.8
121	32.5	30.7904
100	33	61.6717
100.5	33	61.5904
101	33	59.3856
101.5	33	54.498
102	33	52.4245
102.5	33	50.8986
103	33	49.3313
103.5	33	50.3353
104	33	51.4798
104.5	33	49.9379
105	33	47.9829
105.5	33	45.0941
106	33	46.3831
106.5	33	47.2101
107	33	46.8067
107.5	33	46.0377
108	33	45.3251
108.5	33	44.9407
109	33	43.971
109.5	33	42.3531
110	33	38.9473
110.5	33	35.5841
111	33	35.7884
111.5	33	34.2795
112	33	32.4753
112.5	33	31.3325
113	33	30.9337
113.5	33	30.7585
114	33	30.8382
114.5	33	30.9223
115	33	30.9154
115.5	33	30.7746
116	33	30.8697
116.5	33	31.2895
117	33	31.2699
117.5	33	31.1965
118	33	30.5938
118.5	33	29.66
119	33	28.6806
119.5	33	29.0581
120	33	29.9137
120.5	33	30.4076
121	33	30.6398
100	33.5	61.5412
100.5	33.5	61.7022
101	33.5	60.8935
101.5	33.5	59.1212
102	33.5	54.3553
102.5	33.5	50.9315
103	33.5	47.8143
103.5	33.5	48.0231
104	33.5	47.828
104.5	33.5	46.7428
105	33.5	48.8142
105.5	33.5	45.0781
106	33.5	46.5018
106.5	33.5	46.9312
107	33.5	45.8284
107.5	33.5	44.4366
108	33.5	43.1577
108.5	33.5	42.0313
109	33.5	40.2688
109.5	33.5	38.3993
110	33.5	36.7397
110.5	33.5	35.7406
111	33.5	37.0742
111.5	33.5	34.3013
112	33.5	32.5611
112.5	33.5	31.44
113	33.5	30.4953
113.5	33.5	30.0822
114	33.5	30.5383
114.5	33.5	30.8439
115	33.5	30.8739
115.5	33.5	31.3029
116	33.5	31.2469
116.5	33.5	31.3443
117	33.5	31.4572
117.5	33.5	31.6836
118	33.5	31.2537
118.5	33.5	29.737
119	33.5	27.3909
119.5	33.5	28.5653
120	33.5	29.7019
120.5	33.5	30.3815
121	33.5	30.6949
100	34	60.539
100.5	34	61.2797
101	34	61.2766
101.5	34	59.4868
102	34	54.1065
102.5	34	51.3478
103	34	49.4743
103.5	34	46.1395
104	34	45.7135
104.5	34	44.8816
105	34	45.7307
105.5	34	44.3908
106	34	45.4027
106.5	34	44.8977
107	34	42.6853
107.5	34	40.8376
108	34	39.9219
108.5	34	37.7638
109	34	36.2664
109.5	34	34.3729
110	34	34.5129
110.5	34	34.354
111	34	34.6812
111.5	34	33.0952
112	34	32.865
112.5	34	32.2891
113	34	31.3446
113.5	34	30.7816
114	34	30.964
114.5	34	31.1915
115	34	31.5308
115.5	34	31.8895
116	34	32.0116
116.5	34	32.5865
117	34	33.0347
117.5	34	32.5832
118	34	31.4469
118.5	34	29.7546
119	34	28.767
119.5	34	29.6497
120	34	30.3589
120.5	34	30.7886
121	34	31.022
100	34.5	59.4931
100.5	34.5	61.1844
101	34.5	61.4828
101.5	34.5	58.8201
102	34.5	55.0707
102.5	34.5	51.9682
103	34.5	48.7282
103.5	34.5	43.2561
104	34.5	45.4925
104.5	34.5	45.7959
105	34.5	44.0119
105.5	34.5	43.3261
106	34.5	43.5097
106.5	34.5	44.2111
107	34.5	42.732
107.5	34.5	41.5559
108	34.5	38.6012
108.5	34.5	34.3783
109	34.5	31.7639
109.5	34.5	32.4908
110	34.5	33.5301
110.5	34.5	33.7613
111	34.5	32.7849
111.5	34.5	33.3765
112	34.5	33.8695
112.5	34.5	33.822
113	34.5	33.0263
113.5	34.5	32.3914
114	34.5	32.0937
114.5	34.5	32.0487
115	34.5	32.3017
115.5	34.5	32.6596
116	34.5	32.8005
116.5	34.5	33.216
117	34.5	33.5733
117.5	34.5	33.1782
118	34.5	32.4031
118.5	34.5	31.1484
119	34.5	30.2071
119.5	34.5	31.26
120	34.5	31.422
120.5	34.5	31.4565
121	34.5	31.509
100	35	59.9832
100.5	35	61.2606
101	35	60.8673
101.5	35	58.4402
102	35	55.5474
102.5	35	52.8947
103	35	50.2262
103.5	35	46.3937
104	35	46.9088
104.5	35	45.8806
105	35	43.6133
105.5	35	43.3029
106	35	44.0968
106.5	35	46.1316
107	35	45.3425
107.5	35	42.9238
108	35	39.6592
108.5	35	35.9466
109	35	35.8065
109.5	35	34.9436
110	35	34.5484
110.5	35	35.0453
111	35	35.4424
111.5	35	35.4753
112	35	34.9483
112.5	35	34.593
113	35	33.993
113.5	35	33.3033
114	35	32.7356
114.5	35	32.6423
115	35	32.7156
115.5	35	33.0777
116	35	33.0432
116.5	35	33.3181
117	35	33.5312
117.5	35	33.3401
118	35	33.0138
118.5	35	32.5822
119	35	32.4644
119.5	35	32.8715
120	35	32.2651
120.5	35	32.0981
121	35	32.1368
